# Supplementary material
Source: PubMed Central journal article supplement (PMC4718768)
Supplement: NIHMS719837-supplement-8.pdf [file NIHMS719837-supplement-8.pdf]

| Gene_Name | CD56bright  |             |          |          | CD56dim     |             |          |          | CD56bright: Perfusate vs PBMC |         | CD56dim: Perfusate vs. PBMC |         | Liver: CD56bright vs.CD56 dim |         | PBMC: CD56bright vs. CD56dim |         |
|-----------|-------------|-------------|----------|----------|-------------|-------------|----------|----------|-------------------------------|---------|-----------------------------|---------|-------------------------------|---------|------------------------------|---------|
|           | Perfusate 1 | Perfusate 2 | PBMC 1   | PBMC 2   | Perfusate 1 | Perfusate 2 | PBMC 1   | PBMC 2   | FoldChange                    | p-value | FoldChange                  | p-value | FoldChange                    | p-value | FoldChange                   | p-value |
| ABCB1     | 2366.81     | 2048.26     | 549.83   | 312.56   | 1195.95     | 1139.91     | 779.40   | 1037.33  | -5.31                         | 0.09    | -1.30                       | 0.31    | -1.89                         | 0.05    | 2.17                         | 0.18    |
| ABL1      | 329.19      | 344.24      | 174.00   | 104.19   | 181.30      | 142.49      | 157.17   | 130.09   | -2.50                         | 0.17    | -1.13                       | 0.53    | -2.10                         | 0.09    | 1.06                         | 0.86    |
| ADA       | 375.02      | 292.61      | 406.32   | 406.32   | 388.05      | 363.35      | 273.43   | 575.15   | 1.38                          | 0.20    | 1.06                        | 0.91    | 1.13                          | 0.49    | -1.15                        | 0.78    |
| AHR       | 533.37      | 533.58      | 1572.94  | 1958.68  | 152.67      | 284.98      | 167.94   | 376.59   | 3.29                          | 0.06    | 1.21                        | 0.75    | -2.55                         | 0.20    | -6.96                        | 0.11    |
| AIRE      | 12.50       | 25.82       | 41.76    | 62.51    | 15.90       | 3.56        | 2.15     | 6.85     | 2.85                          | 0.16    | -1.96                       | 0.55    | -2.39                         | 0.44    | -13.27                       | 0.11    |
| APP       | 104.17      | 68.85       | 180.96   | 239.63   | 54.07       | 28.50       | 8.61     | 47.93    | 2.46                          | 0.08    | -1.93                       | 0.58    | -2.16                         | 0.20    | -10.27                       | 0.22    |
| ARHGDIB   | 4046.08     | 3803.91     | 2261.98  | 1364.83  | 3696.00     | 3672.64     | 3937.88  | 3697.40  | -2.23                         | 0.19    | 1.04                        | 0.46    | -1.06                         | 0.29    | 2.17                         | 0.20    |
| ATG16L1   | 529.20      | 439.91      | 313.20   | 177.12   | 251.28      | 288.54      | 366.01   | 345.78   | -2.04                         | 0.22    | 1.32                        | 0.12    | -1.79                         | 0.04    | 1.51                         | 0.38    |
| ATM       | 25.00       | 8.61        | 20.88    | 20.84    | 6.36        | 14.25       | 12.92    | 20.54    | 1.42                          | 0.63    | 1.71                        | 0.39    | -1.54                         | 0.59    | -1.28                        | 0.48    |
| BATF      | 70.84       | 94.67       | 62.64    | 72.93    | 152.67      | 185.23      | 135.64   | 160.91   | -1.21                         | 0.39    | -1.14                       | 0.42    | 2.06                          | 0.07    | 2.19                         | 0.02    |
| BATF3     | 4.17        | 51.64       | 13.92    | 10.42    | 6.36        | 3.56        | 2.15     | 17.12    | 1.22                          | 0.90    | 1.27                        | 0.85    | -3.07                         | 0.53    | -1.99                        | 0.63    |
| BCL2      | 137.51      | 68.85       | 180.96   | 145.86   | 353.06      | 406.09      | 411.23   | 438.21   | 1.67                          | 0.36    | 1.12                        | 0.32    | 3.89                          | 0.15    | 2.62                         | 0.05    |
| BCL3      | 433.36      | 490.55      | 473.27   | 718.88   | 454.84      | 659.01      | 729.88   | 804.53   | 1.27                          | 0.45    | 1.40                        | 0.31    | 1.19                          | 0.52    | 1.31                         | 0.41    |
| BCL6      | 1437.59     | 1075.77     | 842.15   | 906.41   | 966.94      | 805.06      | 826.76   | 1064.71  | -1.42                         | 0.23    | 1.06                        | 0.74    | -1.41                         | 0.21    | 1.07                         | 0.67    |
| BID       | 154.18      | 94.67       | 90.48    | 83.35    | 82.70       | 113.99      | 92.58    | 78.74    | -1.39                         | 0.40    | -1.14                       | 0.57    | -1.25                         | 0.54    | -1.01                        | 0.87    |
| BLNK      | 4.17        | 8.61        | 6.96     | 10.42    | 12.72       | 10.69       | 17.22    | 6.85     | 1.42                          | 0.51    | -1.07                       | 0.90    | 1.95                          | 0.31    | 1.27                         | 0.69    |
| BST1      | 8.33        | 25.82       | 97.44    | 31.26    | 3.18        | 10.69       | 10.77    | 13.69    | 3.76                          | 0.24    | 2.08                        | 0.43    | -2.51                         | 0.38    | -4.53                        | 0.22    |
| BST2      | 1412.58     | 1445.83     | 1023.11  | 1583.62  | 814.27      | 1033.04     | 781.55   | 1557.70  | -1.13                         | 0.69    | 1.21                        | 0.69    | -1.56                         | 0.16    | -1.16                        | 0.76    |
| BTK       | 4.17        | 8.61        | 69.60    | 104.19   | 28.63       | 39.18       | 12.92    | 30.81    | 14.22                         | 0.04    | -1.68                       | 0.43    | 5.58                          | 0.09    | -4.26                        | 0.14    |
| C1QA      | 4.17        | 8.61        | 6.96     | 31.26    | 6.36        | 3.56        | 8.61     | 6.85     | 2.46                          | 0.43    | 1.61                        | 0.32    | -1.26                         | 0.67    | -1.92                        | 0.54    |
| C1QB      | 4.17        | 25.82       | 20.88    | 10.42    | 25.45       | 39.18       | 27.99    | 17.12    | 1.42                          | 0.77    | -1.44                       | 0.38    | 3.05                          | 0.43    | 1.48                         | 0.46    |
| C1QBP     | 345.85      | 249.58      | 535.91   | 552.18   | 248.10      | 274.29      | 236.83   | 332.08   | 1.85                          | 0.16    | 1.07                        | 0.74    | -1.13                         | 0.60    | -1.95                        | 0.16    |
| C1R       | 58.34       | 94.67       | 27.84    | 10.42    | 38.17       | 17.81       | 12.92    | 47.93    | -4.38                         | 0.16    | -1.05                       | 0.96    | -2.85                         | 0.17    | 1.46                         | 0.69    |
| C1S       | 12.50       | 8.61        | 6.96     | 31.26    | 6.36        | 7.12        | 6.46     | 3.42     | 2.85                          | 0.09    | -1.43                       | 0.46    | -1.54                         | 0.24    | -6.28                        | 0.10    |
| C2        | 4.17        | 34.42       | 6.96     | 31.26    | 25.45       | 35.62       | 8.61     | 10.27    | 1.23                          | 0.89    | -3.20                       | 0.05    | 2.51                          | 0.54    | -1.57                        | 0.66    |
| C3        | 12.50       | 17.21       | 76.56    | 291.72   | 3.18        | 14.25       | 4.31     | 51.35    | 10.20                         | 0.16    | 2.20                        | 0.65    | -2.17                         | 0.48    | -10.06                       | 0.28    |
| C4A       | 37.50       | 34.42       | 34.80    | 10.42    | 28.63       | 39.18       | 36.60    | 54.78    | -1.89                         | 0.48    | 1.34                        | 0.37    | -1.07                         | 0.73    | 2.35                         | 0.38    |
| C4B       | 29.17       | 60.24       | 6.96     | 20.84    | 25.45       | 24.94       | 23.68    | 44.51    | -3.48                         | 0.22    | 1.29                        | 0.58    | -1.66                         | 0.39    | 2.69                         | 0.29    |
| C5        | 12.50       | 8.61        | 6.96     | 10.42    | 22.27       | 17.81       | 6.46     | 3.42     | -1.21                         | 0.55    | -4.23                       | 0.11    | 1.92                          | 0.12    | -1.82                        | 0.28    |
| C7        | 12.50       | 25.82       | 20.88    | 62.51    | 25.45       | 14.25       | 19.38    | 3.42     | 2.01                          | 0.41    | -2.35                       | 0.50    | 1.06                          | 0.91    | -4.44                        | 0.30    |
| C8G       | 25.00       | 25.82       | 34.80    | 20.84    | 19.08       | 32.06       | 34.45    | 37.66    | 1.06                          | 0.86    | 1.45                        | 0.38    | -1.03                         | 0.93    | 1.34                         | 0.46    |
| C9        | 4.17        | 68.85       | 27.84    | 83.35    | 9.54        | 7.12        | 6.46     | 3.42     | 2.85                          | 0.59    | -1.75                       | 0.30    | -2.06                         | 0.70    | -10.27                       | 0.09    |
| CAMP      | 4.17        | 8.61        | 6.96     | 31.26    | 3.18        | 3.56        | 4.31     | 6.85     | 2.46                          | 0.43    | 1.61                        | 0.27    | -1.78                         | 0.35    | -2.71                        | 0.40    |
| CARD9     | 8.33        | 8.61        | 41.76    | 4.17     | 9.54        | 10.69       | 17.22    | 10.27    | 4.92                          | 0.01    | 1.32                        | 0.48    | 1.19                          | 0.18    | -3.14                        | 0.14    |
| CASP1     | 229.18      | 232.37      | 208.80   | 385.49   | 467.57      | 520.08      | 432.76   | 386.86   | 1.23                          | 0.62    | -1.21                       | 0.14    | 2.14                          | 0.04    | 1.44                         | 0.44    |
| CASP10    | 20.83       | 137.70      | 34.80    | 52.09    | 34.99       | 14.25       | 17.12    | 17.12    | -1.26                         | 0.85    | -1.30                       | 0.66    | -2.39                         | 0.52    | -2.48                        | 0.14    |
| CASP2     | 525.03      | 352.85      | 424.56   | 270.88   | 451.66      | 356.22      | 473.67   | 499.83   | -1.27                         | 0.51    | 1.21                        | 0.34    | -1.07                         | 0.79    | 1.43                         | 0.35    |
| CASP3     | 545.87      | 473.34      | 187.92   | 573.02   | 219.47      | 167.42      | 211.00   | 390.28   | -1.55                         | 0.58    | 1.49                        | 0.40    | -2.66                         | 0.04    | -1.14                        | 0.86    |
| CASP8     | 1429.25     | 1256.49     | 995.27   | 1208.55  | 1459.95     | 1047.29     | 1130.34  | 1615.90  | -1.22                         | 0.25    | 1.09                        | 0.75    | -1.09                         | 0.72    | 1.23                         | 0.44    |
| CASP2     | 25.00       | 25.82       | 55.68    | 10.42    | 12.72       | 3.56        | 10.77    | 13.69    | -1.06                         | 0.96    | 1.80                        | 0.52    | -3.78                         | 0.28    | -1.99                        | 0.56    |
| CCL13     | 12.50       | 25.82       | 13.92    | 10.42    | 25.45       | 10.69       | 4.31     | 3.42     | -1.49                         | 0.46    | -4.29                       | 0.16    | -1.09                         | 0.89    | -3.14                        | 0.03    |
| CCL16     | 8.33        | 25.82       | 13.92    | 10.42    | 3.18        | 7.12        | 6.46     | 3.42     | -1.21                         | 0.79    | -1.01                       | 0.98    | -3.07                         | 0.26    | -2.57                        | 0.17    |
| CCL18     | 4.17        | 25.82       | 6.96     | 10.42    | 12.72       | 10.69       | 15.07    | 13.69    | -1.22                         | 0.86    | 1.23                        | 0.21    | 1.13                          | 0.92    | 1.68                         | 0.22    |
| CCL19     | 4.17        | 8.61        | 187.92   | 208.37   | 9.54        | 3.56        | 2.15     | 10.27    | 33.13                         | 0.06    | -1.24                       | 0.84    | -1.03                         | 0.97    | -42.22                       | 0.13    |
| CCL2      | 16.67       | 8.61        | 487.19   | 718.88   | 3.18        | 42.75       | 27.99    | 1040.75  | 49.52                         | 0.02    | 14.62                       | 0.36    | -1.03                         | 0.99    | -3.46                        | 0.62    |
| CCL20     | 4.17        | 8.61        | 83.52    | 1229.39  | 3.18        | 3.56        | 4.31     | 284.15   | 53.45                         | 0.19    | 10.41                       | 0.46    | -1.78                         | 0.35    | -9.13                        | 0.48    |
| CCL22     | 104.17      | 43.03       | 17330.21 | 16857.19 | 9.54        | 14.25       | 10.77    | 20.54    | 256.00                        | 0.05    | 1.27                        | 0.60    | -5.74                         | 0.11    | -1152.06                     | 0.03    |
| CCL23     | 12.50       | 25.82       | 6.96     | 10.42    | 3.18        | 3.56        | 12.92    | 10.27    | -2.11                         | 0.25    | 3.43                        | 0.03    | -5.35                         | 0.13    | 1.36                         | 0.35    |
| CCL24     | 16.67       | 154.91      | 11205.48 | 7147.12  | 267.18      | 2269.13     | 721.26   | 1187.96  | 176.07                        | 0.12    | 1.19                        | 0.90    | 15.35                         | 0.22    | -9.65                        | 0.02    |
| CCL26     | 4.17        | 8.61        | 6.96     | 20.84    | 9.54        | 14.25       | 2.15     | 3.42     | 2.01                          | 0.41    | -4.29                       | 0.04    | 1.95                          | 0.28    | -4.44                        | 0.19    |
| CCL3      | 2645.99     | 5361.62     | 2087.98  | 9751.75  | 1937.06     | 4513.32     | 2008.77  | 7309.21  | 1.20                          | 0.86    | 1.29                        | 0.77    | -1.27                         | 0.70    | -1.18                        | 0.89    |
| CCL4      | 6796.24     | 15387.75    | 2234.14  | 5834.38  | 17853.41    | 18854.77    | 10567.05 | 24259.04 | -2.83                         | 0.24    | -1.15                       | 0.80    | 1.79                          | 0.39    | 4.44                         | 0.15    |
| CCL5      | 5354.49     | 5619.80     | 1607.74  | 8959.99  | 10156.06    | 13525.71    | 10549.83 | 8158.24  | -4.56                         | 0.12    | -1.27                       | 0.35    | 2.14                          | 0.11    | 7.73                         | 0.05    |
| CCL7      | 4.17        | 8.61        | 118.32   | 62.51    | 6.36        | 7.12        | 6.46     | 82.16    | 14.32                         | 0.03    | 3.43                        | 0.51    | 1.13                          | 0.80    | -3.73                        | 0.48    |
| CCL8      | 8.33        | 43.03       | 6.96     | 20.84    | 12.72       | 14.25       | 12.92    | 37.66    | -1.57                         | 0.70    | 1.64                        | 0.52    | -1.40                         | 0.75    | 1.83                         | 0.51    |
| CCR10     | 16.67       | 34.42       | 6.96     | 10.42    | 3.18        | 14.25       | 6.46     | 3.42     | -2.81                         | 0.16    | -1.43                       | 0.72    | -3.56                         | 0.31    | -1.82                        | 0.28    |
| CCR5      | 266.68      | 180.73      | 341.04   | 197.95   | 34.99       | 231.54      | 79.66    | 95.86    | 1.18                          | 0.67    | -1.03                       | 0.98    | -2.45                         | 0.52    | -2.97                        | 0.13    |
| CCR6      | 20.83       | 25.82       | 76.56    | 52.09    | 25.45       | 3.56        | 2.15     | 20.54    | 2.73                          | 0.07    | -1.43                       | 0.83    | -2.43                         | 0.53    | -9.51                        | 0.29    |
| CCR7      | 54.17       | 34.42       | 1600.78  | 1187.71  | 9.54        | 28.50       | 58.13    | 23.96    | 32.00                         | 0.01    | 2.27                        | 0.37    | -2.62                         | 0.30    | -37.01                       | 0.05    |
| CCR8      | 8.33        | 8.61        | 69.60    | 10.42    | 6.36        | 3.56        | 2.15     | 6.85     | 3.18                          | 0.44    | -1.24                       | 0.78    | -1.78                         | 0.30    | -7.01                        | 0.25    |
| CCR2      | 4.17        | 34.42       | 187.92   | 156.28   | 3.18        | 7.12        | 2.15     | 3.42     | 14.32                         | 0.24    | -1.75                       | 0.38    | -2.51                         | 0.54    | -63.12                       | 0.02    |
| CD14      | 16.67       | 60.24       | 313.20   | 218.79   | 19.08       | 3.56        | 12.92    | 171.18   | 8.28                          | 0.17    | 5.70                        | 0.39    | -3.84                         | 0.34    | -5.58                        | 0.41    |
| CD19      | 4.17        | 8.61        | 13.92    | 31.26    | 3.18        | 3.56        | 12.92    | 3.42     | 3.48                          | 0.15    | 1.97                        | 0.49    | -1.78                         | 0.35    | -3.14                        | 0.30    |
| CD209     | 8.33        | 17.21       | 6.96     | 20.84    | 9.54        | 163.86      | 25.84    | 20.54    | 1.01                          | 0.99    | -1.72                       | 0.77    | 3.29                          | 0.55    | 1.92                         | 0.44    |
| CD22      | 16.67       | 60.24       | 243.60   | 104.19   | 12.72       | 10.69       | 6.46     | 10.27    | 5.03                          | 0.19    | -2.19                       | 0.21    | -1.78                         | 0.53    | -19.56                       | 0.05    |
| CD24      | 158.34      | 77.46       | 55.68    | 31.26    | 12.72       | 10.69       | 4.31     | 51.35    | -2.66                         | 0.17    | 1.27                        | 0.88    | -9.51                         | 0.09    | -2.81                        | 0.56    |
| CD244     | 866.72      | 722.91      | 633.35   | 427.16   | 1447.23     | 858.49      | 1011.92  | 1636.44  | -1.53                         | 0.24    | 1.16                        | 0.73    | 1.40                          | 0.40    | 2.48                         | 0.10    |
| CD247     | 4975.30     | 5215.31     | 1301.51  | 750.13   | 5925.69     | 7840.42     | 4504.13  | 6833.34  | -5.17                         | 0.10    | -1.23                       | 0.51    | 1.34                          | 0.28    | 5.62                         | 0.04    |
| CD27      | 400.02      | 258.18      | 83.52    | 31.26    | 25.45       | 10.69       | 6.46     | 27.39    | -6.28                         | 0.12    | -1.24                       | 0.83    | -19.43                        | 0.05    | -3.84                        | 0.28    |
| CD274     | 33.34       | 17.21       | 167.04   | 416.74   | 66.80       | 181.67      | 62.44    | 89.01    | 11.00                         | 0.06    | -1.47                       | 0.58    | 4.59                          | 0.14    | -3.53                        | 0.19    |
| CD28      | 137.51      | 163.52      | 48.72    | 41.67    | 6.36        | 21.37       | 2.15     | 6.85     | -3.32                         | 0.01    | -3.03                       | 0.32    | -12.91                        | 0.14    | -11.71                       | 0.14    |
| CD36      | 8.33        | 17.21       | 452.40   | 1260.64  | 28.63       | 81.93       | 6.46     | 65.05    | 63.12                         | 0.03    | -2.36                       | 0.59    | 4.06                          | 0.18    | -36.76                       | 0.16    |
| CD3D      | 212.51      | 490.55      |          |          |             |             |          |          |                               |         |                             |         |                               |         |                              |         |

| Gene_Name | CD56bright  |             |          |          | CD56dim     |             |         |         | CD56bright: Perfusate vs PBMC |         | CD56dim: Perfusate vs PBMC |         | Liver: CD56bright vs CD56 dim |         | PBMC: CD56bright vs. CD56dim |         |
|-----------|-------------|-------------|----------|----------|-------------|-------------|---------|---------|-------------------------------|---------|----------------------------|---------|-------------------------------|---------|------------------------------|---------|
|           | Perfusate 1 | Perfusate 2 | PBMC 1   | PBMC 2   | Perfusate 1 | Perfusate 2 | PBMC 1  | PBMC 2  | FoldChange                    | p-value | FoldChange                 | p-value | FoldChange                    | p-value | FoldChange                   | p-value |
| CD44      | 1020.89     | 1222.07     | 2387.25  | 1656.55  | 674.31      | 911.93      | 979.63  | 814.80  | 1.78                          | 0.15    | 1.14                       | 0.55    | -1.42                         | 0.21    | -2.22                        | 0.09    |
| CD46      | 1216.74     | 929.46      | 863.03   | 750.13   | 1040.10     | 1036.60     | 1141.10 | 1153.73 | -1.32                         | 0.25    | 1.10                       | 0.02    | -1.02                         | 0.89    | 1.42                         | 0.12    |
| CD5       | 54.17       | 17.21       | 250.56   | 229.21   | 22.27       | 17.81       | 62.44   | 13.69   | 7.84                          | 0.17    | 1.46                       | 0.70    | -1.54                         | 0.59    | -8.22                        | 0.22    |
| CD53      | 1104.23     | 963.89      | 1238.87  | 1343.99  | 1135.52     | 1253.90     | 919.34  | 1427.61 | 1.25                          | 0.13    | -1.04                      | 0.88    | 1.16                          | 0.24    | -1.13                        | 0.68    |
| CD55      | 29.17       | 77.46       | 55.68    | 93.77    | 38.17       | 24.94       | 58.13   | 51.35   | 1.52                          | 0.55    | 1.77                       | 0.21    | -1.54                         | 0.53    | -1.32                        | 0.47    |
| CD58      | 629.20      | 593.82      | 1050.95  | 1041.85  | 613.88      | 904.80      | 747.10  | 873.00  | 1.72                          | 0.03    | 1.09                       | 0.75    | 1.22                          | 0.49    | -1.29                        | 0.18    |
| CD59      | 416.69      | 438.91      | 549.83   | 635.53   | 454.84      | 562.83      | 462.90  | 667.59  | 1.39                          | 0.11    | 1.10                       | 0.71    | 1.18                          | 0.35    | -1.06                        | 0.80    |
| CD6       | 383.36      | 499.16      | 48.72    | 72.93    | 423.04      | 901.24      | 964.56  | 366.32  | -7.36                         | 0.02    | -1.04                      | 0.96    | 1.41                          | 0.52    | 9.99                         | 0.09    |
| CD7       | 3037.68     | 2556.02     | 737.75   | 364.65   | 1587.18     | 1424.88     | 854.75  | 1095.53 | -5.39                         | 0.13    | -1.56                      | 0.13    | -1.85                         | 0.04    | 1.87                         | 0.31    |
| CD74      | 3654.39     | 3709.24     | 18763.96 | 17482.31 | 5130.51     | 7227.72     | 6568.88 | 7288.67 | 4.92                          | 0.01    | 1.13                       | 0.59    | 1.66                          | 0.21    | -2.62                        | 0.01    |
| CD79A     | 8.33        | 8.61        | 27.84    | 31.26    | 3.18        | 14.25       | 10.77   | 30.81   | 3.48                          | 0.02    | 2.71                       | 0.40    | -1.26                         | 0.81    | -1.62                        | 0.53    |
| CD80      | 8.33        | 34.42       | 417.60   | 239.63   | 15.90       | 78.37       | 21.53   | 37.66   | 18.64                         | 0.12    | -1.24                      | 0.83    | 2.08                          | 0.56    | -11.08                       | 0.03    |
| CD81      | 2933.51     | 2512.99     | 1050.95  | 760.55   | 2204.24     | 1211.15     | 1205.69 | 2023.30 | -3.03                         | 0.05    | -1.05                      | 0.92    | -1.66                         | 0.33    | 1.74                         | 0.23    |
| CD82      | 66.67       | 120.49      | 591.59   | 854.32   | 209.93      | 427.47      | 678.20  | 746.33  | 7.94                          | 0.04    | 2.38                       | 0.24    | 3.34                          | 0.12    | -1.00                        | 1.00    |
| CD83      | 208.35      | 215.15      | 4029.80  | 4573.74  | 305.35      | 1100.72     | 906.42  | 1016.78 | 20.25                         | 0.01    | 1.66                       | 0.58    | 2.73                          | 0.36    | -4.47                        | 0.00    |
| CD86      | 4.17        | 17.21       | 250.56   | 52.09    | 25.45       | 142.49      | 19.38   | 71.89   | 13.45                         | 0.13    | -1.61                      | 0.70    | 7.11                          | 0.23    | -3.05                        | 0.39    |
| CD8A      | 437.53      | 215.15      | 97.44    | 52.09    | 585.25      | 153.17      | 279.89  | 236.22  | -4.32                         | 0.09    | -1.16                      | 0.86    | -1.03                         | 0.98    | 3.61                         | 0.13    |
| CD8B      | 16.67       | 51.64       | 27.84    | 20.84    | 9.54        | 21.37       | 8.61    | 13.69   | -1.21                         | 0.79    | -1.32                      | 0.63    | -2.06                         | 0.42    | -2.22                        | 0.12    |
| CD9       | 45.84       | 43.03       | 772.55   | 677.20   | 19.08       | 71.24       | 21.53   | 126.67  | 16.34                         | 0.00    | 1.41                       | 0.78    | -1.21                         | 0.82    | -13.83                       | 0.21    |
| CD96      | 4154.42     | 5327.19     | 1552.06  | 1260.64  | 2471.42     | 3708.26     | 2945.34 | 3043.51 | -3.36                         | 0.02    | -1.01                      | 0.97    | -1.56                         | 0.23    | 2.14                         | 0.08    |
| CD97      | 3321.03     | 4337.49     | 1976.62  | 4042.39  | 3845.50     | 5115.33     | 4687.14 | 7196.23 | -1.35                         | 0.51    | 1.31                       | 0.42    | 1.16                          | 0.51    | 2.06                         | 0.25    |
| CDH5      | 4.17        | 8.61        | 6.96     | 10.42    | 6.36        | 3.56        | 2.15    | 6.85    | 1.42                          | 0.51    | -1.24                      | 0.78    | -1.26                         | 0.67    | -2.22                        | 0.38    |
| CDKN1A    | 75.00       | 154.91      | 1698.22  | 2562.96  | 79.52       | 448.84      | 133.49  | 311.54  | 19.29                         | 0.03    | 1.08                       | 0.95    | 1.75                          | 0.63    | -10.20                       | 0.07    |
| CEACAM1   | 4.17        | 17.21       | 13.92    | 10.42    | 3.18        | 3.56        | 2.15    | 3.42    | 1.42                          | 0.71    | -1.24                      | 0.52    | -2.51                         | 0.42    | -4.44                        | 0.05    |
| CEBPB     | 158.34      | 189.33      | 2289.82  | 2177.47  | 289.45      | 431.03      | 178.70  | 510.10  | 12.91                         | 0.01    | -1.17                      | 0.82    | 2.04                          | 0.13    | -7.41                        | 0.16    |
| CFB       | 4.17        | 8.61        | 6.96     | 10.42    | 15.90       | 17.81       | 6.46    | 30.81   | 1.42                          | 0.51    | -1.19                      | 0.86    | 2.81                          | 0.21    | 1.66                         | 0.63    |
| CFD       | 4.17        | 8.61        | 20.88    | 10.42    | 3.18        | 7.12        | 2.15    | 3.42    | 2.46                          | 0.21    | -1.75                      | 0.38    | -1.26                         | 0.71    | -5.43                        | 0.07    |
| CFH       | 16.67       | 86.06       | 6.96     | 52.09    | 19.08       | 10.69       | 12.92   | 17.12   | -1.99                         | 0.65    | 1.04                       | 0.92    | -2.66                         | 0.43    | -1.28                        | 0.85    |
| CFP       | 4.17        | 17.21       | 27.84    | 31.26    | 3.18        | 14.25       | 8.61    | 3.42    | 3.48                          | 0.33    | -1.24                      | 0.83    | -1.26                         | 0.84    | -5.43                        | 0.16    |
| CIITA     | 29.17       | 34.42       | 194.88   | 208.37   | 19.08       | 53.43       | 55.98   | 30.81   | 6.36                          | 0.01    | 1.30                       | 0.71    | 1.01                          | 0.99    | -4.86                        | 0.12    |
| CISH      | 16.67       | 17.21       | 48.72    | 72.93    | 28.63       | 49.87       | 38.75   | 27.39   | 3.53                          | 0.10    | -1.16                      | 0.70    | 2.23                          | 0.21    | -1.83                        | 0.15    |
| CLEC4A    | 41.67       | 60.24       | 215.76   | 229.21   | 34.99       | 71.24       | 34.45   | 41.08   | 4.44                          | 0.07    | -1.33                      | 0.57    | -1.01                         | 0.99    | -5.90                        | 0.02    |
| CLEC4E    | 8.33        | 8.61        | 180.96   | 145.86   | 3.18        | 14.25       | 6.46    | 68.47   | 19.16                         | 0.02    | 3.12                       | 0.51    | -1.26                         | 0.81    | -7.73                        | 0.33    |
| CLEC5A    | 16.67       | 51.64       | 1760.86  | 1135.62  | 31.81       | 160.30      | 21.53   | 253.34  | 48.17                         | 0.06    | 1.04                       | 0.98    | 2.43                          | 0.47    | -19.16                       | 0.24    |
| CLU       | 12.50       | 17.21       | 6.96     | 31.26    | 3.18        | 10.69       | 15.07   | 10.27   | 1.01                          | 1.00    | 1.43                       | 0.42    | -2.51                         | 0.36    | -1.19                        | 0.86    |
| CMKLR1    | 4.17        | 17.21       | 83.52    | 93.77    | 970.12      | 555.70      | 811.69  | 657.32  | 10.41                         | 0.18    | -1.01                      | 0.99    | 86.82                         | 0.07    | 8.28                         | 0.01    |
| CR1       | 4.17        | 60.24       | 13.92    | 20.84    | 3.18        | 10.69       | 4.31    | 3.42    | 1.07                          | 0.97    | -1.52                      | 0.61    | -2.71                         | 0.59    | -4.44                        | 0.04    |
| CR2       | 8.33        | 17.21       | 6.96     | 41.67    | 9.54        | 3.56        | 6.46    | 3.42    | 1.42                          | 0.77    | -1.24                      | 0.75    | -2.06                         | 0.37    | -3.63                        | 0.37    |
| CRADD     | 116.67      | 60.24       | 90.48    | 62.51    | 184.48      | 113.99      | 127.03  | 133.52  | -1.12                         | 0.81    | -1.12                      | 0.73    | 1.73                          | 0.32    | 1.73                         | 0.20    |
| CSF1      | 33.34       | 137.70      | 640.31   | 2062.87  | 41.35       | 156.74      | 92.58   | 208.83  | 16.91                         | 0.10    | 1.73                       | 0.57    | 1.19                          | 0.88    | -8.28                        | 0.11    |
| CSF1R     | 4.17        | 17.21       | 90.48    | 20.84    | 6.36        | 17.81       | 6.46    | 10.27   | 5.13                          | 0.25    | -1.31                      | 0.70    | 1.26                          | 0.82    | -5.31                        | 0.24    |
| CSF2      | 25.00       | 111.88      | 83.52    | 1083.53  | 28.63       | 10.69       | 47.37   | 106.13  | 5.70                          | 0.39    | 4.06                       | 0.16    | -3.03                         | 0.36    | -4.23                        | 0.45    |
| CSF2RB    | 8.33        | 8.61        | 828.23   | 927.25   | 44.53       | 153.17      | 45.21   | 154.06  | 103.25                        | 0.00    | 1.01                       | 0.99    | 9.78                          | 0.17    | -10.48                       | 0.16    |
| CSF3R     | 4.17        | 8.61        | 6.96     | 10.42    | 9.54        | 7.12        | 2.15    | 20.54   | 1.42                          | 0.51    | -1.24                      | 0.88    | 1.38                          | 0.54    | -1.28                        | 0.86    |
| CTLA4     | 8.33        | 86.06       | 55.68    | 83.35    | 28.63       | 24.94       | 15.07   | 27.39   | 2.55                          | 0.57    | -1.32                      | 0.52    | -1.00                         | 1.00    | -3.36                        | 0.09    |
| CTSC      | 1541.76     | 1824.50     | 2115.82  | 1562.78  | 1978.41     | 2140.89     | 2183.17 | 2786.74 | 1.09                          | 0.70    | 1.20                       | 0.36    | 1.23                          | 0.21    | 1.36                         | 0.26    |
| CUL9      | 650.04      | 395.88      | 320.16   | 250.04   | 515.28      | 502.27      | 521.03  | 534.07  | -1.79                         | 0.21    | 1.04                       | 0.18    | -1.00                         | 0.99    | 1.87                         | 0.12    |
| CX3CR1    | 8.33        | 25.82       | 201.84   | 93.77    | 3059.86     | 2051.83     | 1916.19 | 2372.50 | 9.38                          | 0.10    | -1.17                      | 0.57    | 171.25                        | 0.05    | 15.45                        | 0.07    |
| CXCL1     | 25.00       | 43.03       | 1287.59  | 9314.17  | 25.45       | 516.52      | 79.66   | 4902.48 | 105.42                        | 0.11    | 5.46                       | 0.58    | 3.51                          | 0.56    | -5.54                        | 0.56    |
| CXCL10    | 12.50       | 17.21       | 90.48    | 197.95   | 19.08       | 124.68      | 15.07   | 20.54   | 9.13                          | 0.08    | -2.77                      | 0.47    | 3.32                          | 0.42    | -7.62                        | 0.09    |
| CXCL11    | 8.33        | 25.82       | 41.76    | 177.12   | 6.36        | 39.18       | 15.07   | 6.85    | 5.86                          | 0.20    | -1.56                      | 0.72    | 1.08                          | 0.95    | -8.46                        | 0.16    |
| CXCL2     | 16.67       | 25.82       | 779.51   | 7647.21  | 12.72       | 231.54      | 40.91   | 1934.29 | 117.78                        | 0.14    | 5.17                       | 0.57    | 2.62                          | 0.63    | -8.69                        | 0.46    |
| CXCR1     | 4.17        | 8.61        | 13.92    | 10.42    | 22.27       | 14.25       | 15.07   | 13.69   | 2.01                          | 0.28    | -1.24                      | 0.51    | 2.97                          | 0.15    | 1.19                         | 0.43    |
| CXCR2     | 16.67       | 17.21       | 6.96     | 10.42    | 276.72      | 146.05      | 105.50  | 157.48  | -1.99                         | 0.18    | -1.56                      | 0.38    | 11.88                         | 0.08    | 15.14                        | 0.01    |
| CXCR3     | 504.20      | 791.76      | 689.03   | 520.93   | 232.19      | 406.09      | 432.76  | 516.95  | -1.06                         | 0.86    | 1.54                       | 0.35    | -2.06                         | 0.19    | -1.27                        | 0.31    |
| CXCR4     | 6529.56     | 3933.00     | 1489.42  | 948.09   | 4421.21     | 3387.66     | 6751.89 | 3553.61 | -4.26                         | 0.05    | 1.27                       | 0.60    | -1.31                         | 0.47    | 4.11                         | 0.08    |
| CXCR6     | 3116.85     | 2521.59     | 236.64   | 104.19   | 168.58      | 106.87      | 19.38   | 47.93   | -17.88                        | 0.07    | -4.41                      | 0.14    | -20.82                        | 0.02    | -5.17                        | 0.12    |
| CYBB      | 4.17        | 77.46       | 2039.26  | 1614.87  | 79.52       | 156.74      | 34.45   | 219.11  | 101.13                        | 0.19    | -1.28                      | 0.83    | 6.23                          | 0.42    | -20.82                       | 0.18    |
| DEFB1     | 4.17        | 25.82       | 6.96     | 10.42    | 3.18        | 14.25       | 4.31    | 10.27   | -1.22                         | 0.86    | -1.01                      | 0.99    | -1.54                         | 0.75    | -1.28                        | 0.68    |
| DPP4      | 4.17        | 8.61        | 20.88    | 20.84    | 3.18        | 7.12        | 12.92   | 6.85    | 3.48                          | 0.18    | 1.97                       | 0.32    | -1.26                         | 0.71    | -2.22                        | 0.24    |
| EBI3      | 8.33        | 8.61        | 403.68   | 218.79   | 22.27       | 71.24       | 45.21   | 130.09  | 35.02                         | 0.05    | 1.93                       | 0.49    | 4.69                          | 0.23    | -3.86                        | 0.19    |
| ENTPD1    | 25.00       | 60.24       | 27.84    | 10.42    | 6.36        | 14.25       | 12.92   | 23.96   | -2.28                         | 0.34    | 1.85                       | 0.36    | -4.08                         | 0.14    | 1.04                         | 0.96    |
| ETS1      | 8000.48     | 7969.27     | 3201.57  | 2344.17  | 6469.59     | 5329.06     | 6215.79 | 6946.32 | -2.91                         | 0.09    | 1.12                       | 0.44    | -1.36                         | 0.19    | 2.39                         | 0.08    |
| FADD      | 12.50       | 43.03       | 27.84    | 10.42    | 25.45       | 60.56       | 64.59   | 41.08   | -1.37                         | 0.74    | 1.31                       | 0.65    | 1.69                          | 0.56    | 3.03                         | 0.23    |
| FAS       | 83.34       | 77.46       | 20.88    | 31.26    | 60.43       | 60.56       | 60.28   | 51.35   | -3.14                         | 0.08    | -1.09                      | 0.49    | -1.33                         | 0.08    | 2.17                         | 0.13    |
| FCAR      | 4.17        | 25.82       | 556.79   | 562.60   | 12.72       | 57.00       | 6.46    | 147.21  | 53.82                         | 0.14    | 1.15                       | 0.95    | 2.60                          | 0.51    | -18.13                       | 0.31    |
| FCER1A    | 4.17        | 8.61        | 6.96     | 41.67    | 3.18        | 3.56        | 2.15    | 3.42    | 2.85                          | 0.44    | -1.24                      | 0.52    | -1.78                         | 0.35    | -6.28                        | 0.27    |
| FCER1G    | 3058.52     | 2736.75     | 2582.13  | 2500.45  | 2932.63     | 2016.21     | 865.52  | 4481.38 | -1.14                         | 0.24    | -1.23                      | 0.84    | -1.19                         | 0.52    | -1.29                        | 0.81    |
| FCGR1A    | 12.50       | 77.46       | 13.92    | 10.42    | 6.36        | 7.12        | 4.31    | 3.42    | -2.58                         | 0.48    | -1.75                      | 0.34    | -4.63                         | 0.48    | -3.14                        | 0.03    |
| FCGR2A    | 4.17        | 25.82       | 62.64    | 250.04   | 15.90       | 53.43       | 6.46    | 47.93   | 12.04                         | 0.17    | -1.66                      | 0.72    | 2.81                          | 0.46    | -7.11                        | 0.26    |
| FCGR2B    | 29.17       | 8.61        | 83.52    | 20.84    | 50.89       | 24.94       | 17.22   | 13.69   | 2.64                          | 0.41    | -2.31                      | 0.23    | 2.25                          | 0.39    | -2.71                        | 0.38    |
| FCGR2C    | 8.33        | 17.21       | 215.76   | 458.42   | 683.86      |             |         |         |                               |         |                            |         |                               |         |                              |         |

| Gene_Name | CD56bright  |             |          |          | CD56dim     |             |          |          | CD56bright: Perfusate vs PBMC |         | CD56dim: Perfusate vs. PBMC |         | Liver: CD56bright vs.CD56 dim |         | PBMC: CD56bright vs. CD56dim |         |
|-----------|-------------|-------------|----------|----------|-------------|-------------|----------|----------|-------------------------------|---------|-----------------------------|---------|-------------------------------|---------|------------------------------|---------|
|           | Perfusate 1 | Perfusate 2 | PBMC 1   | PBMC 2   | Perfusate 1 | Perfusate 2 | PBMC 1   | PBMC 2   | FoldChange                    | p-value | FoldChange                  | p-value | FoldChange                    | p-value | FoldChange                   | p-value |
| GZMA      | 3225.19     | 2418.32     | 869.99   | 343.81   | 4465.74     | 1442.69     | 2376.94  | 3519.38  | -5.10                         | 0.15    | 1.14                        | 0.86    | -1.10                         | 0.89    | 5.28                         | 0.13    |
| GZMB      | 291.68      | 163.52      | 883.91   | 1125.20  | 7732.34     | 8004.28     | 7468.85  | 6603.96  | 4.56                          | 0.08    | -1.12                       | 0.30    | 36.00                         | 0.05    | 7.06                         | 0.01    |
| HAMP      | 4.17        | 8.61        | 118.32   | 62.51    | 3.18        | 3.56        | 10.77    | 3.42     | 14.32                         | 0.03    | 1.80                        | 0.49    | -1.78                         | 0.35    | -14.12                       | 0.08    |
| HFE       | 4.17        | 17.21       | 6.96     | 10.42    | 12.72       | 3.56        | 2.15     | 13.69    | 1.01                          | 1.00    | -1.24                       | 0.87    | -1.26                         | 0.83    | -1.57                        | 0.71    |
| HLA-C     | 19213.65    | 16084.85    | 6591.05  | 6761.63  | 22430.47    | 26210.73    | 16660.12 | 21571.58 | -2.64                         | 0.05    | -1.28                       | 0.27    | 1.38                          | 0.11    | 2.85                         | 0.08    |
| HLA-DMB   | 525.03      | 456.12      | 814.31   | 802.23   | 111.33      | 99.74       | 174.40   | 109.55   | 1.65                          | 0.09    | 1.31                        | 0.44    | -4.66                         | 0.00    | -5.86                        | 0.08    |
| HLA-DOB   | 166.68      | 68.85       | 243.60   | 312.56   | 197.20      | 42.75       | 34.45    | 30.81    | 2.58                          | 0.26    | -2.81                       | 0.40    | -1.16                         | 0.88    | -8.46                        | 0.02    |
| HLA-DPA1  | 750.04      | 662.67      | 4050.68  | 6365.73  | 887.42      | 1449.82     | 850.45   | 879.84   | 7.21                          | 0.06    | -1.31                       | 0.47    | 1.61                          | 0.29    | -5.86                        | 0.08    |
| HLA-DPB1  | 675.04      | 507.76      | 2735.25  | 2792.17  | 922.41      | 1221.84     | 1227.22  | 766.87   | 4.72                          | 0.06    | -1.09                       | 0.78    | 1.82                          | 0.10    | -2.85                        | 0.14    |
| HLA-DQA1  | 75.00       | 129.09      | 4558.75  | 1364.83  | 41.35       | 217.29      | 409.07   | 54.78    | 25.28                         | 0.08    | 1.58                        | 0.76    | -1.04                         | 0.97    | -16.68                       | 0.17    |
| HLA-DQB1  | 12.50       | 43.03       | 765.59   | 197.95   | 6.36        | 35.62       | 64.59    | 27.39    | 16.80                         | 0.09    | 2.79                        | 0.43    | -1.54                         | 0.73    | -9.25                        | 0.13    |
| HLA-DRA   | 620.87      | 395.88      | 11950.19 | 11189.51 | 330.80      | 1464.07     | 469.36   | 794.26   | 23.26                         | 0.04    | -1.14                       | 0.89    | 1.40                          | 0.73    | -18.90                       | 0.05    |
| HLA-DRB1  | 945.89      | 748.73      | 8101.35  | 7772.23  | 483.47      | 1916.47     | 1778.40  | 647.04   | 9.45                          | 0.03    | -1.12                       | 0.91    | 1.14                          | 0.88    | -7.41                        | 0.16    |
| HLA-DRB3  | 383.36      | 318.43      | 3215.49  | 3823.60  | 232.19      | 1004.54     | 889.20   | 338.93   | 10.06                         | 0.00    | 1.13                        | 0.90    | 1.39                          | 0.74    | -6.41                        | 0.15    |
| ICAM1     | 187.51      | 266.79      | 410.64   | 635.53   | 98.60       | 167.42      | 150.71   | 325.23   | 2.28                          | 0.10    | -1.73                       | 0.38    | -1.74                         | 0.24    | -2.31                        | 0.23    |
| ICAM2     | 416.69      | 318.43      | 257.52   | 156.28   | 792.00      | 587.76      | 570.55   | 712.09   | -1.82                         | 0.21    | -1.07                       | 0.75    | 1.88                          | 0.09    | 3.18                         | 0.09    |
| ICAM3     | 1004.23     | 722.91      | 619.43   | 541.76   | 737.93      | 431.03      | 415.53   | 469.02   | -1.47                         | 0.22    | -1.27                       | 0.53    | -1.52                         | 0.34    | -1.31                        | 0.10    |
| ICAM4     | 33.34       | 86.06       | 69.60    | 72.93    | 15.90       | 7.12        | 15.07    | 23.96    | 1.33                          | 0.66    | 1.79                        | 0.36    | -5.03                         | 0.12    | -3.76                        | 0.11    |
| ICAM5     | 16.67       | 25.82       | 6.96     | 31.26    | 9.54        | 3.56        | 8.61     | 17.12    | -1.40                         | 0.73    | 2.08                        | 0.36    | -3.56                         | 0.20    | -1.21                        | 0.84    |
| ICOS      | 16.67       | 17.21       | 34.80    | 62.51    | 31.81       | 17.81       | 53.83    | 23.96    | 2.75                          | 0.18    | 1.51                        | 0.50    | 1.40                          | 0.45    | -1.30                        | 0.66    |
| ICOSLG    | 29.17       | 17.21       | 194.88   | 229.21   | 19.08       | 28.50       | 6.46     | 13.69    | 9.45                          | 0.06    | -2.48                       | 0.20    | 1.04                          | 0.92    | -22.47                       | 0.07    |
| IFI16     | 1300.08     | 903.64      | 605.51   | 416.74   | 1574.46     | 1581.62     | 1362.87  | 1670.68  | -2.16                         | 0.10    | -1.04                       | 0.74    | 1.45                          | 0.29    | 3.01                         | 0.06    |
| IFI35     | 104.17      | 60.24       | 27.84    | 145.86   | 89.06       | 106.87      | 88.27    | 71.89    | -1.24                         | 0.84    | -1.22                       | 0.28    | 1.23                          | 0.58    | 1.25                         | 0.83    |
| IFIH1     | 129.17      | 180.73      | 187.92   | 448.00   | 139.95      | 181.67      | 193.77   | 301.27   | 1.91                          | 0.36    | 1.52                        | 0.27    | 1.04                          | 0.86    | -1.20                        | 0.75    |
| IFIH2     | 25.00       | 129.09      | 55.68    | 83.35    | 60.43       | 245.79      | 47.37    | 89.01    | 1.20                          | 0.86    | -1.88                       | 0.53    | 2.14                          | 0.55    | -1.05                        | 0.91    |
| IFITM1    | 3725.22     | 3511.30     | 3361.64  | 2135.80  | 3320.68     | 2486.42     | 1769.79  | 3964.43  | -1.35                         | 0.41    | -1.09                       | 0.88    | -1.26                         | 0.35    | -1.01                        | 0.98    |
| IFNAR1    | 145.84      | 172.12      | 187.92   | 135.44   | 165.40      | 174.55      | 183.01   | 150.63   | 1.01                          | 0.97    | -1.02                       | 0.85    | 1.07                          | 0.55    | 1.04                         | 0.86    |
| IFNAR2    | 1708.44     | 1032.73     | 751.67   | 510.51   | 1027.37     | 648.32      | 833.22   | 931.20   | -2.14                         | 0.15    | 1.08                        | 0.80    | -1.62                         | 0.29    | 1.42                         | 0.30    |
| IFNB1     | 4.17        | 51.64       | 6.96     | 10.42    | 12.72       | 7.12        | 8.61     | 6.85     | -1.73                         | 0.74    | -1.24                       | 0.59    | -1.54                         | 0.79    | -1.11                        | 0.71    |
| IFNG      | 16.67       | 34.42       | 62.64    | 1052.27  | 85.88       | 220.86      | 101.19   | 506.68   | 10.70                         | 0.33    | 1.65                        | 0.66    | 5.74                          | 0.11    | -1.13                        | 0.95    |
| IFNGR1    | 704.21      | 585.22      | 327.12   | 250.04   | 365.78      | 430.61      | 438.21   | 438.21   | -2.25                         | 0.05    | 1.24                        | 0.12    | -1.84                         | 0.06    | 1.52                         | 0.20    |
| IGF2R     | 108.34      | 154.91      | 132.24   | 166.70   | 340.34      | 345.53      | 258.36   | 386.86   | 1.15                          | 0.60    | -1.09                       | 0.76    | 2.64                          | 0.12    | 2.13                         | 0.11    |
| IKBKB     | 187.51      | 120.49      | 146.16   | 83.35    | 203.57      | 206.61      | 206.69   | 256.76   | -1.37                         | 0.48    | 1.13                        | 0.39    | 2.08                          | 0.39    | 2.08                         | 0.20    |
| IKBKE     | 170.84      | 154.91      | 132.24   | 229.21   | 209.93      | 178.11      | 163.63   | 198.56   | 1.07                          | 0.85    | -1.07                       | 0.64    | 1.19                          | 0.24    | 1.04                         | 0.92    |
| IKBKG     | 608.37      | 602.43      | 313.20   | 260.46   | 461.21      | 420.34      | 454.29   | 499.83   | -2.11                         | 0.08    | 1.08                        | 0.36    | -1.38                         | 0.09    | 1.67                         | 0.07    |
| IKZF1     | 391.69      | 370.06      | 410.64   | 350.04   | 566.17      | 441.71      | 514.57   | 527.22   | -1.19                         | 0.61    | 1.04                        | 0.80    | 1.31                          | 0.26    | 1.62                         | 0.30    |
| IKZF2     | 1491.76     | 722.91      | 640.31   | 254.23   | 1062.36     | 270.73      | 204.54   | 807.95   | -2.17                         | 0.24    | -1.32                       | 0.80    | -1.93                         | 0.51    | -1.17                        | 0.86    |
| IKZF3     | 1087.57     | 1204.86     | 153.12   | 197.95   | 1189.59     | 1699.17     | 1272.44  | 1458.42  | -6.59                         | 0.02    | -1.04                       | 0.85    | 1.24                          | 0.43    | 7.84                         | 0.01    |
| IL10      | 4.17        | 8.61        | 20.88    | 31.26    | 3.18        | 3.56        | 2.15     | 17.12    | 4.26                          | 0.10    | 1.80                        | 0.67    | -1.78                         | 0.35    | -4.20                        | 0.39    |
| IL10RA    | 1404.25     | 774.55      | 1287.59  | 1218.97  | 1479.04     | 1321.58     | 1522.19  | 1615.90  | 1.20                          | 0.65    | 1.13                        | 0.25    | 1.34                          | 0.50    | 1.25                         | 0.03    |
| IL11RA    | 225.01      | 111.88      | 20.88    | 72.93    | 174.94      | 146.05      | 124.88   | 116.40   | -4.06                         | 0.22    | -1.33                       | 0.16    | 1.01                          | 0.99    | 3.10                         | 0.32    |
| IL12A     | 41.67       | 34.42       | 6.96     | 62.51    | 25.45       | 24.94       | 8.61     | 41.08    | -1.82                         | 0.68    | -1.34                       | 0.77    | -1.51                         | 0.14    | -1.11                        | 0.95    |
| IL12B     | 4.17        | 34.42       | 20.88    | 83.35    | 3.18        | 14.25       | 2.15     | 34.24    | 3.48                          | 0.44    | 1.27                        | 0.90    | -1.78                         | 0.70    | -4.86                        | 0.45    |
| IL12RB1   | 191.68      | 189.33      | 90.48    | 177.12   | 461.21      | 509.40      | 348.79   | 390.28   | -1.51                         | 0.44    | -1.31                       | 0.07    | 2.55                          | 0.03    | 2.91                         | 0.19    |
| IL13      | 4.17        | 8.61        | 6.96     | 41.67    | 9.54        | 7.12        | 2.15     | 3.42     | 2.85                          | 0.44    | -3.03                       | 0.07    | 1.38                          | 0.54    | -6.28                        | 0.27    |
| IL13RA1   | 4.17        | 17.21       | 689.03   | 302.14   | 9.54        | 46.31       | 21.53    | 47.93    | 53.82                         | 0.06    | 1.53                        | 0.69    | 2.48                          | 0.48    | -14.22                       | 0.04    |
| IL15      | 20.83       | 43.03       | 76.56    | 52.09    | 15.90       | 42.75       | 34.45    | 75.32    | 2.11                          | 0.25    | 1.96                        | 0.40    | -1.15                         | 0.84    | -1.24                        | 0.69    |
| IL16      | 2604.32     | 2263.41     | 1134.47  | 760.55   | 1857.54     | 1307.33     | 1393.01  | 2139.70  | -2.62                         | 0.10    | 1.11                        | 0.27    | -1.56                         | 0.21    | 1.85                         | 0.17    |
| IL17A     | 8.33        | 8.61        | 6.96     | 20.84    | 6.36        | 3.56        | 4.31     | 3.42     | 1.42                          | 0.64    | -1.24                       | 0.59    | -1.78                         | 0.30    | -3.14                        | 0.27    |
| IL17F     | 4.17        | 25.82       | 13.92    | 10.42    | 3.18        | 3.56        | 8.61     | 6.85     | 1.16                          | 0.90    | 2.28                        | 0.05    | -3.07                         | 0.43    | -1.57                        | 0.14    |
| IL18      | 87.51       | 163.52      | 125.28   | 52.09    | 54.07       | 21.37       | 10.77    | 78.74    | -1.48                         | 0.55    | -1.16                       | 0.91    | -3.53                         | 0.17    | -2.77                        | 0.48    |
| IL18R1    | 795.88      | 456.12      | 1461.58  | 531.35   | 467.57      | 309.91      | 432.76   | 523.80   | 1.46                          | 0.59    | 1.25                        | 0.46    | -1.58                         | 0.33    | -1.85                        | 0.43    |
| IL18RAP   | 966.72      | 636.85      | 1350.23  | 1062.69  | 919.23      | 530.77      | 867.67   | 1537.16  | 1.53                          | 0.25    | 1.66                        | 0.33    | -1.13                         | 0.77    | -1.04                        | 0.92    |
| IL1A      | 4.17        | 60.24       | 97.44    | 1291.90  | 3.18        | 17.81       | 10.77    | 455.33   | 22.32                         | 0.24    | 9.32                        | 0.43    | -2.10                         | 0.69    | -5.06                        | 0.56    |
| IL1B      | 41.67       | 34.42       | 5769.78  | 20326.57 | 41.35       | 395.41      | 111.96   | 9815.22  | 286.03                        | 0.07    | 8.22                        | 0.51    | 3.39                          | 0.48    | -10.34                       | 0.48    |
| IL1R1     | 4.17        | 43.03       | 111.36   | 104.19   | 3.18        | 3.56        | 4.31     | 3.42     | 6.06                          | 0.32    | 1.14                        | 0.45    | -3.97                         | 0.45    | -28.05                       | 0.01    |
| IL1R2     | 20.83       | 60.24       | 494.15   | 135.44   | 6.36        | 21.37       | 8.61     | 17.12    | 7.31                          | 0.15    | -1.04                       | 0.96    | -3.03                         | 0.30    | -21.26                       | 0.08    |
| IL1RAP    | 33.34       | 51.64       | 55.68    | 156.28   | 50.89       | 67.68       | 58.13    | 44.51    | 2.25                          | 0.34    | 1.16                        | 0.54    | 1.41                          | 0.33    | -1.83                        | 0.44    |
| IL1RL1    | 4.17        | 8.61        | 13.92    | 10.42    | 6.36        | 7.12        | 2.15     | 10.27    | 2.01                          | 0.28    | -1.43                       | 0.73    | 1.13                          | 0.80    | -2.57                        | 0.44    |
| IL1RL2    | 12.50       | 17.21       | 13.92    | 10.42    | 3.18        | 3.56        | 2.15     | 6.85     | -1.21                         | 0.46    | 1.14                        | 0.86    | -4.35                         | 0.05    | -3.14                        | 0.28    |
| IL1RN     | 16.67       | 146.30      | 1600.78  | 5230.11  | 426.22      | 2582.60     | 312.19   | 955.16   | 58.49                         | 0.11    | -1.92                       | 0.61    | 21.26                         | 0.17    | -5.31                        | 0.18    |
| IL2       | 4.17        | 94.67       | 20.88    | 20.84    | 6.36        | 10.69       | 6.46     | 30.81    | 1.05                          | 0.98    | 1.71                        | 0.62    | -2.41                         | 0.17    | -1.47                        | 0.70    |
| IL20      | 8.33        | 17.21       | 34.80    | 83.35    | 9.54        | 21.37       | 2.15     | 20.54    | 4.50                          | 0.12    | -2.14                       | 0.62    | 1.19                          | 0.78    | -8.11                        | 0.29    |
| IL21      | 4.17        | 51.64       | 6.96     | 10.42    | 3.18        | 3.56        | 6.46     | 10.27    | -1.73                         | 0.74    | 2.43                        | 0.15    | -4.35                         | 0.45    | -1.04                        | 0.90    |
| IL21R     | 58.34       | 51.64       | 118.32   | 145.86   | 98.60       | 153.17      | 92.58    | 102.71   | 2.39                          | 0.03    | -1.26                       | 0.48    | 2.23                          | 0.15    | -1.35                        | 0.17    |
| IL22      | 4.17        | 8.61        | 6.96     | 10.42    | 3.18        | 3.56        | 2.15     | 6.85     | 1.42                          | 0.51    | 1.14                        | 0.86    | -1.78                         | 0.35    | -2.22                        | 0.38    |
| IL23A     | 4.17        | 8.61        | 27.84    | 114.60   | 9.54        | 10.69       | 8.61     | 92.43    | 9.45                          | 0.15    | 2.79                        | 0.55    | 1.68                          | 0.38    | -2.00                        | 0.67    |
| IL23R     | 283.35      | 163.52      | 55.68    | 125.02   | 12.72       | 10.69       | 2.15     | 30.81    | -2.58                         | 0.21    | -1.43                       | 0.83    | -18.51                        | 0.04    | -10.27                       | 0.31    |
| IL26      | 75.00       | 163.52      | 55.68    | 125.02   | 73.16       | 42.75       | 21.53    | 85.59    | -1.33                         | 0.66    | -1.30                       | 0.77    | -1.99                         | 0.30    | -1.95                        | 0.51    |
| IL28B     | 20.83       | 34.42       | 6.96     | 20.84    | 3.18        | 7.12        | 4.31     | 6.85     | -2.22                         | 0.36    | 1.14                        | 0.81    | -5.62                         | 0.09    | -2.22                        | 0.36    |
| IL29      | 12.50       | 8.61        | 6.96     | 20.84    | 12.72       | 17.81       | 4.31     | 10.27    | 1.16                          | 0.83    | -2.27                       | 0.28    | 1.45                          | 0.28    | -1.82                        | 0.49    |

| Gene_Name | CD56bright  |             |          |           | CD56dim     |             |         |          | CD56bright: Perfusate vs PBMC |         | CD56dim: Perfusate vs. PBMC |         | Liver: CD56bright vs. CD56 dim |         | PBMC: CD56bright vs. CD56dim |         |
|-----------|-------------|-------------|----------|-----------|-------------|-------------|---------|----------|-------------------------------|---------|-----------------------------|---------|--------------------------------|---------|------------------------------|---------|
|           | Perfusate 1 | Perfusate 2 | PBMC 1   | PBMC 2    | Perfusate 1 | Perfusate 2 | PBMC 1  | PBMC 2   | FoldChange                    | p-value | FoldChange                  | p-value | FoldChange                     | p-value | FoldChange                   | p-value |
| IL6R      | 4.17        | 34.42       | 180.96   | 343.81    | 28.63       | 92.62       | 17.22   | 54.78    | 20.82                         | 0.19    | -1.68                       | 0.59    | 4.29                           | 0.38    | -8.11                        | 0.12    |
| IL6ST     | 266.68      | 318.43      | 348.00   | 250.04    | 206.75      | 206.61      | 206.69  | 219.11   | 1.01                          | 0.96    | 1.03                        | 0.50    | -1.41                          | 0.16    | -1.39                        | 0.29    |
| IL7R      | 458.36      | 490.55      | 5943.78  | 1625.29   | 111.33      | 156.74      | 781.55  | 232.80   | 6.54                          | 0.21    | 3.23                        | 0.29    | -3.58                          | 0.08    | -7.31                        | 0.16    |
| IL8       | 116.67      | 559.40      | 48162.68 | 129617.02 | 626.60      | 8998.14     | 968.86  | 39325.94 | 308.69                        | 0.04    | 2.60                        | 0.72    | 9.32                           | 0.31    | -12.82                       | 0.39    |
| IL9       | 4.17        | 8.61        | 20.88    | 20.84     | 9.54        | 3.96        | 2.15    | 3.42     | 3.48                          | 0.18    | -2.14                       | 0.34    | -1.03                          | 0.97    | -7.67                        | 0.07    |
| IRAK2     | 212.51      | 266.79      | 417.60   | 406.32    | 159.04      | 195.92      | 137.79  | 390.28   | 1.73                          | 0.13    | 1.31                        | 0.69    | -1.35                          | 0.19    | -1.78                        | 0.47    |
| IRAK3     | 12.50       | 25.82       | 174.00   | 250.04    | 15.90       | 21.37       | 8.61    | 58.20    | 11.63                         | 0.05    | 1.21                        | 0.87    | 1.03                           | 0.96    | -9.32                        | 0.25    |
| IRAK4     | 450.03      | 533.58      | 389.76   | 291.72    | 454.84      | 466.65      | 363.86  | 499.83   | -1.45                         | 0.19    | -1.08                       | 0.71    | -1.06                          | 0.60    | 1.27                         | 0.39    |
| IRF1      | 1116.73     | 1686.80     | 1350.23  | 2000.36   | 1339.09     | 1727.67     | 1132.49 | 1999.33  | 1.20                          | 0.59    | -1.01                       | 0.98    | 1.11                           | 0.72    | -1.09                        | 0.82    |
| IRF3      | 2058.46     | 1617.95     | 876.95   | 604.28    | 1294.56     | 1478.32     | 1304.73 | 1420.76  | -2.51                         | 0.07    | -1.01                       | 0.86    | -1.32                          | 0.22    | 1.87                         | 0.17    |
| IRF4      | 283.35      | 507.76      | 626.39   | 468.83    | 305.35      | 997.42      | 490.89  | 438.21   | 1.42                          | 0.42    | -1.19                       | 0.82    | 1.45                           | 0.64    | -1.16                        | 0.47    |
| IRF5      | 29.17       | 25.82       | 55.68    | 41.67     | 15.90       | 35.62       | 21.53   | 41.08    | 1.75                          | 0.12    | 1.25                        | 0.71    | -1.16                          | 0.78    | -1.62                        | 0.35    |
| IRF7      | 595.87      | 757.34      | 396.72   | 979.34    | 432.58      | 591.33      | 441.37  | 920.93   | -1.08                         | 0.90    | 1.26                        | 0.64    | -1.33                          | 0.29    | 1.02                         | 0.97    |
| IRF8      | 329.19      | 327.03      | 180.96   | 364.65    | 143.13      | 181.67      | 66.74   | 369.74   | -1.27                         | 0.61    | -1.03                       | 0.98    | -2.03                          | 0.11    | -1.64                        | 0.67    |
| IRGM      | 54.17       | 43.03       | 34.80    | 41.67     | 41.35       | 21.37       | 10.77   | 20.54    | -1.27                         | 0.25    | -2.00                       | 0.27    | -1.62                          | 0.36    | -2.57                        | 0.19    |
| ITGA2B    | 12.50       | 17.21       | 20.88    | 20.84     | 3.18        | 7.12        | 4.31    | 10.27    | 1.42                          | 0.27    | 1.39                        | 0.63    | -3.07                          | 0.18    | -3.14                        | 0.23    |
| ITGA4     | 1320.91     | 1359.77     | 702.95   | 437.58    | 569.35      | 477.34      | 643.75  | 496.41   | -2.41                         | 0.17    | 1.09                        | 0.66    | -2.57                          | 0.05    | 1.02                         | 0.95    |
| ITGA5     | 145.84      | 215.15      | 981.35   | 1073.11   | 731.57      | 812.18      | 607.15  | 1122.91  | 5.78                          | 0.06    | 1.07                        | 0.86    | 4.35                           | 0.07    | -1.24                        | 0.61    |
| ITGA6     | 179.18      | 86.06       | 111.36   | 72.93     | 50.89       | 17.81       | 60.28   | 61.62    | -1.38                         | 0.54    | 2.03                        | 0.41    | -4.11                          | 0.17    | -1.47                        | 0.32    |
| ITGAL     | 2700.16     | 2160.14     | 1746.94  | 1177.29   | 2360.10     | 2237.07     | 1731.03 | 2280.06  | -1.68                         | 0.18    | -1.16                       | 0.48    | -1.05                          | 0.73    | 1.39                         | 0.32    |
| ITGAM     | 233.35      | 206.55      | 730.79   | 1604.45   | 928.77      | 352.66      | 566.25  | 1420.76  | 4.92                          | 0.15    | 1.57                        | 0.29    | 2.60                           | 0.29    | -1.21                        | 0.79    |
| ITGAX     | 154.18      | 275.40      | 3131.97  | 3990.30   | 521.64      | 933.30      | 161.48  | 1078.41  | 17.15                         | 0.04    | -1.67                       | 0.68    | 3.39                           | 0.10    | -8.46                        | 0.26    |
| ITGB1     | 1591.76     | 1308.13     | 1524.22  | 1114.78   | 1774.84     | 1613.68     | 2109.97 | 1722.03  | -1.11                         | 0.65    | 1.13                        | 0.44    | 1.17                           | 0.32    | 1.46                         | 0.20    |
| ITGB2     | 1329.25     | 748.73      | 1893.10  | 2490.03   | 2382.36     | 1054.41     | 1358.56 | 3111.98  | 2.17                          | 0.18    | 1.30                        | 0.70    | 1.59                           | 0.46    | -1.06                        | 0.92    |
| JAK1      | 4229.42     | 3700.63     | 2909.25  | 2208.73   | 3762.80     | 3063.50     | 3539.57 | 4734.72  | -1.56                         | 0.14    | 1.21                        | 0.41    | -1.16                          | 0.36    | 1.61                         | 0.14    |
| JAK2      | 1095.90     | 903.64      | 883.91   | 1073.11   | 753.83      | 815.75      | 641.60  | 708.67   | -1.02                         | 0.89    | -1.16                       | 0.15    | -1.27                          | 0.21    | -1.44                        | 0.11    |
| JAK3      | 462.53      | 344.24      | 250.56   | 364.65    | 604.34      | 612.70      | 587.78  | 842.19   | -1.32                         | 0.37    | 1.16                        | 0.57    | 1.53                           | 0.21    | 2.33                         | 0.08    |
| KIR2DL1   | 4.17        | 25.82       | 6.96     | 10.42     | 63.61       | 89.06       | 47.37   | 51.35    | -1.22                         | 0.86    | -1.53                       | 0.23    | 7.26                           | 0.27    | 5.78                         | 0.06    |
| KIR2DL2   | 4.17        | 8.61        | 13.92    | 10.42     | 85.88       | 92.62       | 38.75   | 54.78    | 2.01                          | 0.28    | -1.93                       | 0.15    | 14.93                          | 0.08    | 3.84                         | 0.03    |
| KIR2DL3   | 258.35      | 327.03      | 48.72    | 52.09     | 900.15      | 808.62      | 454.29  | 455.33   | -5.78                         | 0.03    | -1.88                       | 0.05    | 2.93                           | 0.04    | 9.00                         | 0.01    |
| KIR2DL5A  | 62.50       | 163.52      | 13.92    | 10.42     | 346.70      | 242.23      | 60.28   | 51.35    | -8.40                         | 0.12    | -5.21                       | 0.04    | 2.87                           | 0.24    | 4.63                         | 0.02    |
| KIR2DS1   | 8.33        | 25.82       | 6.96     | 31.26     | 34.99       | 64.12       | 8.61    | 3.42     | 1.01                          | 1.00    | -8.75                       | 0.07    | 3.23                           | 0.25    | -2.71                        | 0.39    |
| KIR2DS2   | 8.33        | 43.03       | 27.84    | 10.42     | 111.33      | 252.92      | 15.07   | 17.12    | -1.11                         | 0.92    | -10.48                      | 0.10    | 8.88                           | 0.18    | -1.06                        | 0.92    |
| KIR2DS3   | 12.50       | 25.82       | 13.92    | 10.42     | 41.35       | 92.62       | 12.92   | 13.69    | -1.49                         | 0.46    | -4.66                       | 0.16    | 3.43                           | 0.15    | 1.10                         | 0.62    |
| KIR2DS4   | 16.67       | 163.52      | 20.88    | 31.26     | 117.69      | 416.78      | 38.75   | 27.39    | -2.04                         | 0.64    | -8.82                       | 0.18    | 4.23                           | 0.41    | 1.27                         | 0.46    |
| KIR2DS5   | 16.67       | 17.21       | 6.96     | 62.51     | 3.18        | 7.12        | 8.61    | 6.85     | 1.23                          | 0.88    | 1.61                        | 0.44    | -3.56                          | 0.20    | -2.71                        | 0.53    |
| KIR3DL1   | 462.53      | 628.25      | 647.27   | 187.53    | 1106.89     | 1082.91     | 529.64  | 414.25   | -1.55                         | 0.61    | -2.33                       | 0.09    | 2.03                           | 0.13    | 1.35                         | 0.72    |
| KIR3DL2   | 220.85      | 327.03      | 48.72    | 10.42     | 528.00      | 965.36      | 223.91  | 51.35    | -11.96                        | 0.17    | -6.68                       | 0.20    | 2.66                           | 0.13    | 4.76                         | 0.28    |
| KIR3DL3   | 4.17        | 25.82       | 6.96     | 10.42     | 6.36        | 3.56        | 4.31    | 3.42     | -1.22                         | 0.86    | -1.24                       | 0.59    | -2.17                          | 0.55    | -2.22                        | 0.10    |
| KIR3DL5   | 25.00       | 43.03       | 48.72    | 41.67     | 200.39      | 170.99      | 66.74   | 143.79   | 1.38                          | 0.44    | -1.89                       | 0.34    | 5.66                           | 0.08    | 2.17                         | 0.28    |
| KIT       | 87.51       | 197.94      | 501.11   | 302.14    | 41.35       | 10.69       | 12.92   | 44.51    | 2.95                          | 0.18    | 1.14                        | 0.90    | -6.28                          | 0.17    | -16.22                       | 0.10    |
| KLRB1     | 9754.75     | 6936.54     | 2136.70  | 1635.71   | 11304.30    | 5535.67     | 2936.73 | 10564.97 | -4.41                         | 0.02    | -1.42                       | 0.69    | -1.04                          | 0.93    | 2.99                         | 0.33    |
| KLRC1     | 962.56      | 671.28      | 1155.35  | 968.92    | 648.87      | 327.72      | 546.87  | 1095.53  | 1.32                          | 0.48    | 1.68                        | 0.40    | -1.74                          | 0.32    | -1.37                        | 0.53    |
| KLRD1     | 3812.73     | 3433.84     | 2721.33  | 1864.92   | 5105.06     | 5931.08     | 4514.90 | 6323.24  | -1.60                         | 0.22    | -1.03                       | 0.89    | 1.52                           | 0.05    | 2.38                         | 0.08    |
| LAIR1     | 95.84       | 163.52      | 403.68   | 250.04    | 324.43      | 352.66      | 189.47  | 561.46   | 2.53                          | 0.12    | -1.04                       | 0.96    | 2.69                           | 0.16    | 1.03                         | 0.97    |
| LCK       | 1945.95     | 1686.80     | 702.95   | 385.49    | 1752.58     | 1592.31     | 2301.58 | 1211.92  | -3.48                         | 0.13    | -1.00                       | 1.00    | -1.09                          | 0.46    | 3.20                         | 0.12    |
| LCP2      | 1958.45     | 2031.05     | 1545.10  | 1312.74   | 1991.13     | 2123.08     | 2118.58 | 2228.71  | -1.40                         | 0.14    | 1.03                        | 0.31    | 1.06                           | 0.52    | 1.53                         | 0.10    |
| LEF1      | 87.51       | 8.61        | 341.04   | 291.72    | 31.81       | 3.56        | 81.81   | 30.81    | 11.47                         | 0.28    | 4.72                        | 0.37    | -2.58                          | 0.61    | -6.28                        | 0.16    |
| LIF       | 70.84       | 34.42       | 6.96     | 72.93     | 12.72       | 3.56        | 10.27   | 10.27    | -2.19                         | 0.62    | -1.43                       | 0.76    | -7.36                          | 0.14    | -4.79                        | 0.40    |
| LILRA1    | 8.33        | 8.61        | 20.88    | 10.42     | 6.36        | 3.56        | 4.31    | 6.85     | 1.74                          | 0.36    | 1.14                        | 0.76    | -1.78                          | 0.30    | -2.71                        | 0.16    |
| LILRA2    | 4.17        | 25.82       | 69.60    | 104.19    | 19.08       | 35.62       | 12.92   | 30.81    | 8.22                          | 0.25    | -1.31                       | 0.67    | 2.51                           | 0.49    | -4.26                        | 0.14    |
| LILRA3    | 25.00       | 25.82       | 62.64    | 104.19    | 368.96      | 374.03      | 469.36  | 232.80   | 3.18                          | 0.14    | -1.13                       | 0.80    | 14.62                          | 0.00    | 4.08                         | 0.09    |
| LILRA5    | 8.33        | 51.64       | 27.84    | 31.26     | 6.36        | 17.81       | 6.46    | 13.69    | 1.42                          | 0.77    | -1.13                       | 0.87    | -1.95                          | 0.60    | -3.14                        | 0.20    |
| LILRA6    | 8.33        | 43.03       | 6.96     | 20.84     | 12.72       | 53.43       | 2.15    | 17.12    | -1.57                         | 0.70    | -4.29                       | 0.38    | 1.38                           | 0.80    | -1.99                        | 0.63    |
| LILRB1    | 16.67       | 43.03       | 55.68    | 93.77     | 365.78      | 320.60      | 477.97  | 219.11   | 2.69                          | 0.24    | -1.06                       | 0.91    | 12.82                          | 0.11    | 4.47                         | 0.10    |
| LILRB2    | 16.67       | 34.42       | 34.80    | 52.09     | 9.54        | 21.37       | 4.31    | 20.54    | 1.78                          | 0.33    | -1.52                       | 0.70    | -1.68                          | 0.44    | -4.53                        | 0.29    |
| LILRB3    | 4.17        | 8.61        | 76.56    | 156.28    | 6.36        | 35.62       | 2.15    | 13.69    | 18.25                         | 0.03    | -2.77                       | 0.50    | 2.51                           | 0.47    | -20.11                       | 0.16    |
| LILRB4    | 4.17        | 34.42       | 278.40   | 302.14    | 19.08       | 60.56       | 6.46    | 44.51    | 24.25                         | 0.20    | -2.00                       | 0.61    | 2.83                           | 0.50    | -17.15                       | 0.21    |
| LILRB5    | 4.17        | 8.61        | 6.96     | 10.42     | 3.18        | 14.25       | 2.15    | 6.85     | 1.42                          | 0.51    | -1.75                       | 0.62    | 1.13                           | 0.91    | -2.22                        | 0.38    |
| LITAF     | 800.05      | 903.64      | 849.11   | 656.37    | 2439.62     | 2137.33     | 2019.54 | 2283.49  | -1.14                         | 0.49    | -1.06                       | 0.57    | 2.69                           | 0.01    | 2.87                         | 0.04    |
| LTA       | 75.00       | 120.49      | 222.72   | 395.90    | 63.61       | 32.06       | 79.66   | 82.16    | 3.12                          | 0.10    | 1.79                        | 0.34    | -2.10                          | 0.23    | -3.68                        | 0.14    |
| LTB4R     | 137.51      | 34.42       | 118.32   | 41.67     | 168.58      | 85.49       | 133.49  | 106.13   | 1.02                          | 0.98    | -1.01                       | 0.98    | 1.74                           | 0.57    | 1.69                         | 0.49    |
| LTB4R2    | 141.68      | 68.85       | 41.76    | 41.67     | 104.96      | 57.00       | 71.05   | 71.89    | -2.36                         | 0.25    | -1.08                       | 0.84    | -1.27                          | 0.66    | 1.72                         | 0.01    |
| LTBR      | 33.34       | 51.64       | 271.44   | 239.63    | 22.27       | 81.93       | 21.53   | 99.28    | 6.15                          | 0.06    | 1.08                        | 0.94    | 1.03                           | 0.97    | -5.50                        | 0.27    |
| LY96      | 4.17        | 8.61        | 111.36   | 135.44    | 9.54        | 24.94       | 6.46    | 34.24    | 20.53                         | 0.06    | -1.04                       | 0.27    | 2.57                           | 0.27    | -8.28                        | 0.24    |
| MAF       | 116.67      | 86.06       | 48.72    | 83.35     | 270.36      | 306.35      | 561.94  | 380.01   | -1.57                         | 0.31    | 1.60                        | 0.23    | 2.87                           | 0.06    | 7.26                         | 0.03    |
| MAP4K1    | 608.37      | 516.37      | 271.44   | 156.28    | 333.98      | 395.41      | 273.43  | 318.39   | -2.71                         | 0.15    | -1.23                       | 0.21    | -1.55                          | 0.07    | 1.43                         | 0.41    |
| MAP4K2    | 375.02      | 309.82      | 229.68   | 83.35     | 311.71      | 284.98      | 271.28  | 294.42   | -2.46                         | 0.32    | -1.06                       | 0.47    | -1.14                          | 0.37    | 2.04                         | 0.39    |
| MAP4K4    | 337.52      | 275.40      | 396.72   | 270.88    | 209.93      | 288.54      | 273.43  | 311.54   | 1.07                          | 0.78    | 1.19                        | 0.47    | -1.24                          | 0.39    | -1.13                        | 0.65    |
| MAPK1     | 1783.44     | 1445.83     | 1134.47  | 843.90    | 1348.63     | 1136.34     | 1033.45 | 1249.58  | -1.64                         | 0.13    | -1.09                       | 0.57    | -1.30                          | 0.20    | 1.16                         | 0.50    |
| MAPK11    | 58.34       | 60.24       | 20.88    | 52.09     | 12.72       | 28.50       | 25.84   | 37.66    | -1.80                         | 0.42    | 1.64                        | 0.42    |                                |         |                              |         |

| Gene_Name | CD56bright  |             |         |         | CD56dim     |             |          |          | CD56bright: Perfusate vs PBMC |         | CD56dim: Perfusate vs. PBMC |         | Liver: CD56bright vs. CD56 dim |         | PBMC: CD56bright vs. CD56dim |         |
|-----------|-------------|-------------|---------|---------|-------------|-------------|----------|----------|-------------------------------|---------|-----------------------------|---------|--------------------------------|---------|------------------------------|---------|
|           | Perfusate 1 | Perfusate 2 | PBMC 1  | PBMC 2  | Perfusate 1 | Perfusate 2 | PBMC 1   | PBMC 2   | FoldChange                    | p-value | FoldChange                  | p-value | FoldChange                     | p-value | FoldChange                   | p-value |
| NCF4      | 25.00       | 60.24       | 132.24  | 197.95  | 15.90       | 57.00       | 21.53    | 75.32    | 4.17                          | 0.15    | 1.34                        | 0.78    | -1.29                          | 0.78    | -4.03                        | 0.25    |
| NCR1      | 2933.51     | 2056.86     | 1398.94 | 843.90  | 2210.60     | 1592.31     | 2187.47  | 2454.66  | -2.27                         | 0.13    | 1.23                        | 0.41    | -1.31                          | 0.38    | 2.13                         | 0.19    |
| NFATC1    | 70.84       | 120.49      | 76.56   | 62.51   | 79.52       | 96.18       | 75.36    | 130.09   | -1.34                         | 0.46    | 1.13                        | 0.73    | -1.06                          | 0.87    | 1.43                         | 0.40    |
| NFATC2    | 1483.42     | 1437.22     | 890.87  | 666.79  | 2258.31     | 1667.11     | 1683.67  | 2745.66  | -1.89                         | 0.14    | 1.11                        | 0.76    | 1.33                           | 0.31    | 2.79                         | 0.09    |
| NFATC3    | 1066.73     | 765.95      | 765.59  | 562.60  | 1628.53     | 1143.47     | 1520.04  | 1588.51  | -1.38                         | 0.29    | 1.14                        | 0.60    | 1.51                           | 0.23    | 2.36                         | 0.11    |
| NFIL3     | 104.17      | 154.91      | 111.36  | 83.35   | 127.23      | 153.17      | 66.74    | 171.18   | -1.32                         | 0.39    | -1.31                       | 0.67    | 1.10                           | 0.72    | 1.11                         | 0.86    |
| NFKB1     | 304.18      | 361.46      | 856.07  | 979.34  | 397.59      | 826.43      | 948.31   | 684.66   | 2.77                          | 0.01    | 1.40                        | 0.52    | 1.73                           | 0.37    | -1.13                        | 0.57    |
| NFKB1A    | 1654.27     | 2616.28     | 3786.20 | 5813.54 | 3199.81     | 4128.60     | 3778.56  | 7819.31  | 2.25                          | 0.12    | 1.49                        | 0.46    | 1.74                           | 0.20    | 1.16                         | 0.77    |
| NFKB1Z    | 241.68      | 352.85      | 375.84  | 843.90  | 286.27      | 391.84      | 376.78   | 783.99   | 1.93                          | 0.32    | 1.62                        | 0.39    | 1.15                           | 0.63    | -1.04                        | 0.95    |
| NOD2      | 20.83       | 25.82       | 97.44   | 125.02  | 54.07       | 96.18       | 71.05    | 68.47    | 4.76                          | 0.01    | -1.04                       | 0.93    | 3.12                           | 0.13    | -1.58                        | 0.16    |
| NOS2      | 8.33        | 34.42       | 6.96    | 10.42   | 12.72       | 10.69       | 6.46     | 10.27    | -1.99                         | 0.50    | -1.43                       | 0.34    | -1.45                          | 0.69    | -1.04                        | 0.90    |
| NOTCH1    | 395.86      | 499.16      | 556.79  | 604.28  | 359.42      | 288.54      | 340.18   | 640.20   | 1.30                          | 0.23    | 1.45                        | 0.44    | -1.39                          | 0.18    | -1.24                        | 0.62    |
| NOTCH2    | 341.69      | 292.61      | 682.07  | 656.37  | 534.36      | 445.28      | 514.57   | 653.89   | 2.11                          | 0.05    | 1.19                        | 0.38    | 1.55                           | 0.07    | -1.16                        | 0.44    |
| PAX5      | 4.17        | 34.42       | 20.88   | 10.42   | 9.54        | 3.56        | 2.15     | 10.27    | 1.23                          | 0.88    | -1.24                       | 0.84    | -2.06                          | 0.62    | -3.14                        | 0.36    |
| PDCD1     | 12.50       | 8.61        | 6.96    | 10.42   | 6.36        | 7.12        | 2.15     | 17.12    | -1.21                         | 0.55    | -1.11                       | 0.94    | -1.54                          | 0.24    | -1.40                        | 0.80    |
| PDCD1LG2  | 4.17        | 8.61        | 6.96    | 31.26   | 3.18        | 35.62       | 19.38    | 6.85     | 2.46                          | 0.43    | 1.08                        | 0.96    | 1.78                           | 0.72    | -1.28                        | 0.81    |
| PDGFB     | 4.17        | 17.21       | 55.68   | 41.67   | 3.18        | 3.56        | 8.61     | 6.85     | 5.70                          | 0.24    | 2.28                        | 0.05    | -2.51                          | 0.42    | -6.28                        | 0.01    |
| PDGFBR    | 4.17        | 8.61        | 6.96    | 62.51   | 171.76      | 195.92      | 101.19   | 164.33   | 3.48                          | 0.45    | -1.42                       | 0.37    | 30.70                          | 0.06    | 6.19                         | 0.34    |
| PLAU      | 4.17        | 51.64       | 187.92  | 270.88  | 6.36        | 103.30      | 19.38    | 95.86    | 15.35                         | 0.27    | 1.68                        | 0.78    | 1.74                           | 0.79    | -5.24                        | 0.27    |
| PLAUR     | 8.33        | 17.21       | 737.75  | 1531.52 | 44.53       | 413.22      | 90.43    | 575.15   | 88.65                         | 0.01    | 1.68                        | 0.76    | 11.31                          | 0.25    | -4.66                        | 0.32    |
| PML       | 112.51      | 77.46       | 83.52   | 72.93   | 127.23      | 81.93       | 105.50   | 102.71   | -1.20                         | 0.51    | 1.02                        | 0.94    | 1.09                           | 0.79    | 1.34                         | 0.14    |
| POU2F2    | 129.17      | 163.52      | 250.56  | 270.88  | 286.27      | 217.29      | 374.63   | 551.19   | 1.79                          | 0.10    | 1.83                        | 0.14    | 1.72                           | 0.10    | 1.74                         | 0.20    |
| PPARG     | 16.67       | 25.82       | 34.80   | 20.84   | 6.36        | 28.50       | 6.46     | 3.42     | 1.30                          | 0.52    | -2.87                       | 0.37    | -1.54                          | 0.67    | -5.74                        | 0.05    |
| PPBP      | 12.50       | 8.61        | 257.52  | 916.83  | 57.25       | 170.99      | 27.99    | 366.32   | 46.85                         | 0.08    | 1.02                        | 0.99    | 9.51                           | 0.12    | -4.79                        | 0.42    |
| PRDM1     | 262.52      | 275.40      | 320.16  | 427.16  | 855.62      | 1168.40     | 1132.49  | 1057.87  | 1.38                          | 0.26    | 1.09                        | 0.66    | 3.71                           | 0.07    | 2.97                         | 0.07    |
| PRF1      | 6808.74     | 3416.63     | 4976.35 | 2615.05 | 15964.06    | 12841.76    | 13305.70 | 15388.71 | -1.34                         | 0.60    | -1.00                       | 1.00    | 2.97                           | 0.17    | 3.97                         | 0.13    |
| PRKCD     | 154.18      | 129.09      | 612.47  | 293.30  | 197.20      | 260.04      | 243.29   | 352.62   | 4.72                          | 0.01    | 1.29                        | 0.39    | 1.60                           | 0.12    | -2.28                        | 0.10    |
| PSMB10    | 925.06      | 981.10      | 542.87  | 656.37  | 1008.29     | 1407.07     | 1005.46  | 1451.57  | -1.59                         | 0.10    | 1.01                        | 0.96    | 1.25                           | 0.40    | 2.03                         | 0.11    |
| PSMB5     | 4.17        | 8.61        | 6.96    | 10.42   | 19.08       | 17.12       | 21.53    | 20.54    | 1.42                          | 0.51    | 1.80                        | 0.44    | 1.95                           | 0.40    | 2.46                         | 0.14    |
| PSMB9     | 1375.08     | 1239.28     | 1287.59 | 1375.25 | 1841.64     | 1902.22     | 1795.62  | 2389.61  | 1.02                          | 0.79    | 1.11                        | 0.61    | 1.43                           | 0.07    | 1.56                         | 0.18    |
| PSMC2     | 412.52      | 481.94      | 709.91  | 625.11  | 502.55      | 669.70      | 495.20   | 564.88   | 1.49                          | 0.06    | -1.09                       | 0.64    | 1.30                           | 0.28    | -1.26                        | 0.13    |
| PSMD7     | 537.53      | 800.37      | 1155.35 | 979.34  | 753.83      | 748.06      | 574.86   | 886.69   | 1.62                          | 0.21    | -1.05                       | 0.85    | 1.15                           | 0.62    | -1.49                        | 0.29    |
| PTAFR     | 20.83       | 34.42       | 104.40  | 72.93   | 12.72       | 17.81       | 112.98   | 3.25     | 0.07                          | 0.21    | 3.27                        | 0.38    | -1.78                          | 0.21    | -1.77                        | 0.62    |
| PTGER4    | 375.02      | 636.85      | 194.88  | 239.63  | 741.11      | 1464.07     | 1057.14  | 1280.40  | -2.27                         | 0.16    | 1.12                        | 0.80    | 2.13                           | 0.23    | 5.39                         | 0.01    |
| PTGS2     | 12.50       | 25.82       | 20.88   | 656.37  | 3.18        | 14.25       | 2.15     | 195.14   | 6.50                          | 0.47    | 3.05                        | 0.71    | -2.68                          | 0.40    | -5.70                        | 0.61    |
| PTK2      | 108.34      | 111.88      | 180.96  | 354.23  | 44.53       | 17.81       | 6.46     | 126.67   | 2.30                          | 0.24    | 1.01                        | 0.99    | -3.92                          | 0.21    | -8.88                        | 0.37    |
| PTPN2     | 1170.90     | 981.10      | 647.27  | 343.81  | 626.60      | 644.76      | 589.93   | 698.40   | -2.27                         | 0.21    | 1.01                        | 0.93    | -1.68                          | 0.10    | 1.36                         | 0.50    |
| PTPN22    | 2633.49     | 2469.96     | 1064.87 | 802.23  | 1577.64     | 1399.95     | 1311.19  | 1441.30  | -2.75                         | 0.08    | -1.08                       | 0.42    | -1.72                          | 0.03    | 1.48                         | 0.19    |
| PTPN6     | 591.70      | 843.40      | 869.99  | 875.16  | 852.43      | 1382.14     | 704.04   | 1407.07  | 1.23                          | 0.44    | -1.09                       | 0.86    | 1.54                           | 0.30    | 1.14                         | 0.77    |
| PTPRC     | 7604.62     | 7048.42     | 4412.59 | 2500.45 | 7961.35     | 8114.71     | 8076.00  | 6573.15  | -2.20                         | 0.21    | -1.10                       | 0.51    | 1.09                           | 0.23    | 2.19                         | 0.19    |
| RAG1      | 8.33        | 51.64       | 6.96    | 10.42   | 9.54        | 28.50       | 2.15     | 13.69    | -2.43                         | 0.50    | -3.03                       | 0.43    | -1.26                          | 0.85    | -1.57                        | 0.71    |
| RAG2      | 20.83       | 34.42       | 6.96    | 10.42   | 15.90       | 14.25       | 15.07    | 6.85     | -3.14                         | 0.08    | -1.48                       | 0.50    | -1.78                          | 0.25    | 1.19                         | 0.74    |
| RARRES3   | 1495.92     | 1376.98     | 438.48  | 333.39  | 1320.00     | 1360.76     | 908.58   | 1331.75  | -3.76                         | 0.05    | -1.21                       | 0.49    | -1.07                          | 0.32    | 2.87                         | 0.06    |
| RORC      | 4.17        | 43.03       | 27.84   | 10.42   | 9.54        | 17.81       | 2.15     | 6.85     | 1.27                          | 0.87    | -3.39                       | 0.24    | -1.03                          | 0.99    | -4.44                        | 0.19    |
| RUNX1     | 391.69      | 387.28      | 264.48  | 395.90  | 308.53      | 527.21      | 366.01   | 304.69   | -1.21                         | 0.53    | -1.21                       | 0.61    | 1.04                           | 0.92    | 1.04                         | 0.90    |
| SELL      | 183.34      | 137.70      | 2018.38 | 1479.43 | 225.83      | 78.37       | 219.61   | 475.87   | 10.85                         | 0.01    | 2.43                        | 0.32    | -1.20                          | 0.80    | -5.35                        | 0.11    |
| SELPLG    | 45.84       | 34.42       | 27.84   | 31.26   | 104.96      | 49.87       | 40.91    | 71.89    | -1.35                         | 0.26    | 1.83                        | 0.33    | 1.84                           | 0.33    | 1.84                         | 0.27    |
| SERPIN1   | 4.17        | 8.61        | 48.72   | 93.77   | 15.90       | 199.48      | 8.61     | 23.96    | 11.31                         | 0.04    | -3.92                       | 0.47    | 9.38                           | 0.31    | -4.69                        | 0.15    |
| SH2D1A    | 2425.15     | 1772.86     | 549.83  | 427.16  | 1084.63     | 562.83      | 977.47   | 1177.69  | -4.29                         | 0.02    | 1.38                        | 0.51    | -2.66                          | 0.16    | 2.22                         | 0.04    |
| SIGIRR    | 1420.92     | 1222.07     | 584.63  | 760.55  | 1160.96     | 748.06      | 798.77   | 1078.41  | -1.97                         | 0.07    | -1.01                       | 0.99    | -1.41                          | 0.34    | 1.39                         | 0.24    |
| SKI       | 366.69      | 645.46      | 528.95  | 593.86  | 400.77      | 530.77      | 421.99   | 592.27   | 1.15                          | 0.70    | 1.09                        | 0.75    | -1.06                          | 0.89    | -1.12                        | 0.62    |
| SLAMF1    | 12.50       | 8.61        | 41.76   | 41.67   | 6.36        | 3.56        | 4.31     | 10.27    | 4.03                          | 0.08    | 1.39                        | 0.59    | -2.17                          | 0.17    | -6.28                        | 0.15    |
| SLAMF7    | 3308.53     | 2590.44     | 1955.74 | 2146.22 | 2948.53     | 3501.65     | 2503.97  | 3700.82  | -1.42                         | 0.18    | -1.06                       | 0.83    | 1.09                           | 0.60    | 1.48                         | 0.28    |
| SMAD3     | 1404.25     | 1136.01     | 890.87  | 625.11  | 1202.31     | 1086.47     | 1476.98  | 1639.86  | -1.69                         | 0.15    | 1.37                        | 0.05    | -1.10                          | 0.51    | 2.08                         | 0.13    |
| SMAD5     | 358.35      | 327.03      | 389.76  | 197.95  | 254.46      | 242.23      | 213.15   | 308.12   | -1.23                         | 0.65    | 1.04                        | 0.89    | -1.38                          | 0.05    | -1.09                        | 0.86    |
| SOC3      | 487.53      | 611.03      | 389.76  | 1302.32 | 57.25       | 192.36      | 124.88   | 225.95   | 1.30                          | 0.74    | 1.60                        | 0.58    | -5.21                          | 0.21    | -4.23                        | 0.21    |
| SOC33     | 37.50       | 34.42       | 146.16  | 698.04  | 6.36        | 96.18       | 12.92    | 178.02   | 8.88                          | 0.22    | 1.95                        | 0.76    | -1.45                          | 0.83    | -6.68                        | 0.36    |
| SPP1      | 20.83       | 25.82       | 320.16  | 510.51  | 63.61       | 292.10      | 167.94   | 116.40   | 17.39                         | 0.02    | 1.03                        | 0.98    | 5.90                           | 0.25    | -2.89                        | 0.08    |
| SRC       | 12.50       | 51.64       | 334.08  | 385.49  | 9.54        | 14.25       | 10.27    | 14.12    | 14.12                         | 0.16    | -1.43                       | 0.36    | -2.17                          | 0.46    | -44.02                       | 0.03    |
| STAT1     | 325.02      | 611.03      | 981.35  | 2552.54 | 521.64      | 1959.22     | 688.97   | 2256.10  | 3.56                          | 0.18    | 1.23                        | 0.84    | 2.27                           | 0.42    | -1.27                        | 0.78    |
| STAT2     | 737.54      | 654.07      | 661.19  | 645.95  | 696.58      | 801.50      | 596.39   | 756.60   | -1.06                         | 0.49    | -1.11                       | 0.54    | 1.08                           | 0.51    | 1.03                         | 0.86    |
| STAT4     | 1425.09     | 1480.25     | 626.39  | 427.16  | 1173.69     | 1300.21     | 1530.80  | 1485.81  | -2.81                         | 0.11    | 1.22                        | 0.14    | -1.17                          | 0.16    | 2.91                         | 0.11    |
| STAT5A    | 416.69      | 223.76      | 424.56  | 635.53  | 378.51      | 470.21      | 503.81   | 773.71   | 1.71                          | 0.31    | 1.48                        | 0.29    | 1.39                           | 0.48    | 1.21                         | 0.60    |
| STAT5B    | 937.56      | 886.43      | 570.71  | 562.60  | 709.30      | 1136.34     | 940.87   | 842.19   | -1.61                         | 0.03    | -1.01                       | 0.98    | -1.01                          | 0.96    | 1.57                         | 0.07    |
| SYK       | 654.21      | 456.12      | 549.83  | 354.23  | 470.75      | 89.06       | 176.55   | 376.59   | -1.24                         | 0.53    | 1.26                        | 0.83    | -2.68                          | 0.44    | -1.72                        | 0.37    |
| TAGAP     | 2387.64     | 3304.75     | 779.51  | 2510.87 | 4233.55     | 4652.25     | 5106.98  | 7090.10  | -2.01                         | 0.44    | 1.36                        | 0.30    | 1.58                           | 0.20    | 4.29                         | 0.22    |
| TAL1      | 4.17        | 25.82       | 13.92   | 10.42   | 6.36        | 3.56        | 6.46     | 3.42     | 1.16                          | 0.90    | -1.01                       | 0.98    | -2.17                          | 0.55    | -2.57                        | 0.17    |
| TAP1      | 316.69      | 215.15      | 285.36  | 385.49  | 448.48      | 662.57      | 516.73   | 664.16   | 1.27                          | 0.44    | 1.07                        | 0.79    | 2.08                           | 0.12    | 1.77                         | 0.10    |
| TAP2      | 191.68      | 120.49      | 222.72  | 229.21  | 260.82      | 270.73      | 279.89   | 325.23   | 1.48                          | 0.34    | 1.13                        | 0.33    | 1.75                           | 0.25    | 1.34                         | 0.15    |
| TAPBP     | 2208.47     | 1996.62     | 2018.38 | 2208.73 | 3126.65     | 3384.10     | 2973.33  | 5337.26  | 1.01                          | 0.94    | 1.22                        | 0.61    | 1.55                           | 0.02    | 1.89                         | 0.27    |
| TBK1      | 304.18      | 232.37      | 292.32  | 312.56  | 279.90      | 341.97</    |          |          |                               |         |                             |         |                                |         |                              |         |

| Gene_Name | CD56bright  |             |        |         | CD56dim     |             |         |         | CD56bright: Perfusate vs PBMC |         | CD56dim: Perfusate vs. PBMC |         | Liver: CD56bright vs. CD56 dim |         | PBMC: CD56bright vs. CD56dim |         |
|-----------|-------------|-------------|--------|---------|-------------|-------------|---------|---------|-------------------------------|---------|-----------------------------|---------|--------------------------------|---------|------------------------------|---------|
|           | Perfusate 1 | Perfusate 2 | PBMC 1 | PBMC 2  | Perfusate 1 | Perfusate 2 | PBMC 1  | PBMC 2  | FoldChange                    | p-value | FoldChange                  | p-value | FoldChange                     | p-value | FoldChange                   | p-value |
| TLR1      | 750.04      | 688.49      | 494.15 | 573.02  | 562.99      | 466.65      | 424.15  | 643.62  | -1.35                         | 0.1     | 1.02                        | 0.94    | -1.4                           | 0.13    | -1.02                        | 0.95    |
| TLR2      | 12.5        | 25.82       | 229.68 | 510.51  | 34.99       | 85.49       | 17.22   | 212.26  | 19.03                         | 0.03    | 1.1                         | 0.95    | 3.05                           | 0.2     | -5.66                        | 0.39    |
| TLR3      | 16.67       | 17.21       | 6.96   | 41.67   | 34.99       | 35.62       | 43.06   | 54.78   | 1.01                          | 1       | 1.38                        | 0.23    | 2.08                           | 0       | 2.85                         | 0.45    |
| TLR4      | 4.17        | 68.85       | 34.8   | 31.26   | 12.72       | 14.25       | 10.77   | 13.69   | 1.95                          | 0.72    | -1.11                       | 0.54    | -1.26                          | 0.9     | -2.71                        | 0.04    |
| TLR5      | 4.17        | 8.61        | 20.88  | 20.84   | 9.54        | 7.12        | 15.07   | 10.27   | 3.48                          | 0.18    | 1.51                        | 0.24    | 1.38                           | 0.54    | -1.68                        | 0.23    |
| TLR7      | 4.17        | 25.82       | 6.96   | 10.42   | 3.18        | 7.12        | 4.31    | 10.27   | -1.22                         | 0.86    | 1.39                        | 0.63    | -2.17                          | 0.55    | -1.28                        | 0.68    |
| TLR8      | 4.17        | 43.03       | 13.92  | 20.84   | 6.36        | 17.81       | 4.31    | 3.42    | 1.27                          | 0.87    | -2.77                       | 0.29    | -1.26                          | 0.88    | -4.44                        | 0.04    |
| TLR9      | 20.83       | 25.82       | 27.84  | 62.51   | 22.27       | 21.37       | 21.53   | 23.96   | 1.8                           | 0.37    | 1.04                        | 0.59    | -1.06                          | 0.67    | -1.84                        | 0.37    |
| TMEM173   | 58.34       | 8.61        | 97.44  | 145.86  | 238.55      | 195.92      | 282.05  | 239.65  | 5.31                          | 0.32    | 1.21                        | 0.29    | 9.65                           | 0.25    | 2.17                         | 0.12    |
| TNF       | 175.01      | 860.61      | 793.43 | 2156.64 | 314.89      | 840.68      | 391.85  | 941.47  | 3.36                          | 0.35    | 1.18                        | 0.82    | 1.33                           | 0.8     | -2.16                        | 0.37    |
| TNFAIP3   | 1854.28     | 2676.5      | 2067.1 | 3073.47 | 4131.76     | 8004.28     | 5509.59 | 5946.65 | 1.13                          | 0.69    | -1.01                       | 0.99    | 2.58                           | 0.16    | 2.27                         | 0.14    |
| TNFAIP6   | 12.5        | 17.21       | 27.84  | 83.35   | 12.72       | 7.12        | 2.15    | 20.54   | 3.29                          | 0.26    | -1.43                       | 0.8     | -1.54                          | 0.35    | -7.26                        | 0.3     |
| TNFRSF10C | 12.5        | 17.21       | 55.68  | 10.42   | 3.18        | 7.12        | 4.31    | 10.27   | 1.65                          | 0.86    | 1.39                        | 0.63    | -3.07                          | 0.18    | -3.63                        | 0.34    |
| TNFRSF11A | 50          | 17.21       | 250.56 | 260.46  | 6.36        | 3.56        | 10.77   | 27.39   | 8.69                          | 0.15    | 3.61                        | 0.17    | -6.15                          | 0.13    | -14.83                       | 0.11    |
| TNFRSF13B | 4.17        | 34.42       | 6.96   | 10.42   | 3.18        | 17.81       | 6.46    | 10.27   | -1.4                          | 0.8     | 1.08                        | 0.94    | -1.59                          | 0.77    | -1.04                        | 0.9     |
| TNFRSF13C | 25          | 43.03       | 13.92  | 31.26   | 47.71       | 106.87      | 193.77  | 13.69   | -1.57                         | 0.46    | -1.39                       | 0.85    | 2.17                           | 0.27    | 2.46                         | 0.62    |
| TNFRSF14  | 458.36      | 352.85      | 348    | 395.9   | 562.99      | 719.57      | 732.03  | 910.66  | -1.09                         | 0.65    | 1.28                        | 0.27    | 1.58                           | 0.13    | 2.2                          | 0.04    |
| TNFRSF17  | 4.17        | 34.42       | 20.88  | 20.84   | 6.36        | 10.69       | 2.15    | 10.27   | 1.74                          | 0.69    | -1.75                       | 0.6     | -1.45                          | 0.78    | -4.44                        | 0.31    |
| TNFRSF1B  | 325.02      | 232.37      | 633.35 | 677.2   | 779.28      | 936.86      | 798.77  | 849.03  | 2.38                          | 0.11    | -1.04                       | 0.76    | 3.12                           | 0.05    | 1.26                         | 0.04    |
| TNFRSF4   | 8.33        | 34.42       | 612.47 | 635.53  | 44.53       | 199.48      | 241.14  | 325.23  | 36.76                         | 0.12    | 2.97                        | 0.38    | 5.58                           | 0.24    | -2.23                        | 0.11    |
| TNFRSF8   | 20.83       | 51.64       | 62.64  | 10.42   | 12.72       | 10.69       | 8.61    | 6.85    | -1.28                         | 0.83    | -1.52                       | 0.11    | -2.81                          | 0.25    | -3.32                        | 0.41    |
| TNFRSF9   | 137.51      | 146.3       | 215.76 | 239.63  | 534.36      | 1189.78     | 1868.83 | 1735.72 | 1.6                           | 0.03    | 2.27                        | 0.29    | 5.62                           | 0.14    | 7.94                         | 0       |
| TNFSF10   | 516.7       | 611.03      | 403.68 | 781.39  | 279.9       | 220.86      | 269.13  | 492.99  | -1                            | 1       | 1.46                        | 0.41    | -2.27                          | 0.04    | -1.54                        | 0.44    |
| TNFSF11   | 25          | 8.61        | 83.52  | 62.51   | 34.99       | 7.12        | 4.31    | 17.12   | 4.92                          | 0.19    | -1.84                       | 0.62    | 1.08                           | 0.95    | -8.4                         | 0.19    |
| TNFSF12   | 508.36      | 542.19      | 201.84 | 197.95  | 521.64      | 463.09      | 411.23  | 407.4   | -2.62                         | 0.01    | -1.2                        | 0.2     | -1.07                          | 0.46    | 2.04                         | 0       |
| TNFSF13B  | 29.17       | 60.24       | 132.24 | 52.09   | 41.35       | 10.69       | 30.14   | 27.39   | 1.99                          | 0.37    | 1.37                        | 0.72    | -2                             | 0.49    | -2.89                        | 0.26    |
| TNFSF15   | 8.33        | 8.61        | 174    | 375.07  | 25.45       | 24.94       | 8.61    | 85.59   | 30.06                         | 0.07    | 1.08                        | 0.96    | 2.97                           | 0       | -9.38                        | 0.28    |
| TNFSF8    | 4.17        | 25.82       | 6.96   | 20.84   | 3.18        | 7.12        | 2.15    | 3.42    | 1.16                          | 0.9     | -1.75                       | 0.38    | -2.17                          | 0.55    | -4.44                        | 0.19    |
| TOLLIP    | 325.02      | 275.4       | 361.92 | 448     | 356.24      | 370.47      | 366.01  | 393.7   | 1.35                          | 0.17    | 1.04                        | 0.43    | 1.21                           | 0.24    | -1.06                        | 0.68    |
| TRAF1     | 425.03      | 473.34      | 2171.5 | 3010.96 | 1230.94     | 1741.92     | 2284.36 | 1941.13 | 5.7                           | 0.04    | 1.43                        | 0.25    | 3.27                           | 0.07    | -1.21                        | 0.43    |
| TRAF4     | 83.34       | 111.88      | 167.04 | 520.93  | 47.71       | 53.43       | 49.52   | 82.16   | 3.05                          | 0.29    | 1.27                        | 0.52    | -1.92                          | 0.11    | -4.63                        | 0.19    |
| TRAF5     | 404.19      | 421.7       | 508.07 | 333.39  | 136.77      | 128.24      | 180.85  | 157.48  | -1                            | 0.99    | 1.27                        | 0.13    | -3.12                          | 0       | -2.45                        | 0.12    |
| TYK2      | 620.87      | 524.97      | 354.96 | 354.23  | 515.28      | 445.28      | 488.74  | 561.46  | -1.61                         | 0.11    | 1.09                        | 0.47    | -1.19                          | 0.26    | 1.47                         | 0.11    |
| VCAM1     | 50          | 94.67       | 20.88  | 52.09   | 25.45       | 163.86      | 163.63  | 17.12   | -2.08                         | 0.33    | -1.22                       | 0.9     | -1.06                          | 0.96    | 1.6                          | 0.75    |
| VTN       | 12.5        | 43.03       | 20.88  | 41.67   | 9.54        | 17.81       | 6.46    | 6.85    | 1.27                          | 0.77    | -1.96                       | 0.27    | -1.78                          | 0.52    | -4.44                        | 0.14    |
| XPB1      | 316.69      | 395.88      | 424.56 | 427.16  | 238.55      | 224.42      | 200.23  | 427.94  | 1.21                          | 0.35    | 1.27                        | 0.65    | -1.53                          | 0.14    | -1.45                        | 0.5     |
| XCL1      | 208.35      | 524.97      | 229.68 | 375.07  | 82.7        | 103.3       | 131.33  | 198.56  | -1.13                         | 0.85    | 1.74                        | 0.18    | -3.58                          | 0.21    | -1.82                        | 0.21    |
| XCR1      | 12.5        | 43.03       | 20.88  | 10.42   | 25.45       | 7.12        | 10.77   | 10.27   | -1.57                         | 0.6     | -1.28                       | 0.76    | -1.72                          | 0.6     | -1.4                         | 0.51    |
| ZAP70     | 1770.94     | 1075.77     | 800.39 | 885.58  | 1797.11     | 1342.95     | 1100.2  | 1927.44 | -1.64                         | 0.29    | -1.06                       | 0.86    | 1.13                           | 0.73    | 1.73                         | 0.29    |

Supplementary Table 1
