# Supplementary material
Source: PubMed Central journal article supplement (PMC4718768)
Supplement: NIHMS719837-supplement-9.pdf [file NIHMS719837-supplement-9.pdf]

| Gene_Name | CD56Bright  |             |          |           | CD56Dim     |             |         |          | CD56Bright: Liver vs. Blood |         |
|-----------|-------------|-------------|----------|-----------|-------------|-------------|---------|----------|-----------------------------|---------|
|           | Perfusate 1 | Perfusate 2 | PBMC 1   | PBMC 2    | Perfusate 1 | Perfusate 2 | PBMC 1  | PBMC 2   | FoldChange                  | p-value |
| IL8       | 116.67      | 559.40      | 48162.68 | 129617.02 | 626.60      | 8998.14     | 968.86  | 39325.94 | 308.69                      | 0.04    |
| CSF2RB    | 8.33        | 8.61        | 828.23   | 927.25    | 44.53       | 153.17      | 45.21   | 154.06   | 103.25                      | 0.00    |
| PLAUR     | 8.33        | 17.21       | 737.75   | 1531.52   | 44.53       | 413.22      | 90.43   | 575.15   | 88.65                       | 0.01    |
| CD36      | 8.33        | 17.21       | 452.40   | 1260.64   | 28.63       | 81.93       | 6.46    | 65.05    | 63.12                       | 0.03    |
| CCL2      | 16.67       | 8.61        | 487.19   | 718.88    | 3.18        | 42.75       | 27.99   | 1040.75  | 49.52                       | 0.02    |
| CCR7      | 54.17       | 34.42       | 1600.78  | 1187.71   | 9.54        | 28.50       | 58.13   | 23.96    | 32.00                       | 0.01    |
| FCGR2C    | 8.33        | 17.21       | 215.76   | 458.42    | 683.86      | 331.29      | 338.03  | 643.62   | 26.35                       | 0.02    |
| HLA-DRA   | 620.87      | 395.88      | 11950.19 | 11189.51  | 330.80      | 1464.07     | 469.36  | 794.26   | 23.26                       | 0.04    |
| CD83      | 208.35      | 215.15      | 4029.80  | 4573.74   | 305.35      | 1100.72     | 906.42  | 1016.78  | 20.25                       | 0.01    |
| CDKN1A    | 75.00       | 154.91      | 1698.22  | 2562.96   | 79.52       | 448.84      | 133.49  | 311.54   | 19.29                       | 0.03    |
| CLEC4E    | 8.33        | 8.61        | 180.96   | 145.86    | 3.18        | 14.25       | 6.46    | 68.47    | 19.16                       | 0.02    |
| TLR2      | 12.50       | 25.82       | 229.68   | 510.51    | 34.99       | 85.49       | 17.22   | 212.26   | 19.03                       | 0.03    |
| LILRB3    | 4.17        | 8.61        | 76.56    | 156.28    | 6.36        | 35.62       | 2.15    | 13.69    | 18.25                       | 0.03    |
| SPP1      | 20.83       | 25.82       | 320.16   | 510.51    | 63.61       | 292.10      | 167.94  | 116.40   | 17.39                       | 0.02    |
| ITGAX     | 154.18      | 275.40      | 3131.97  | 3990.30   | 521.64      | 933.30      | 161.48  | 1078.41  | 17.15                       | 0.04    |
| CD9       | 45.84       | 43.03       | 772.55   | 677.20    | 19.08       | 71.24       | 21.53   | 126.67   | 16.34                       | 0.00    |
| CCL7      | 4.17        | 8.61        | 118.32   | 62.51     | 6.36        | 7.12        | 6.46    | 82.16    | 14.32                       | 0.03    |
| HAMP      | 4.17        | 8.61        | 118.32   | 62.51     | 3.18        | 3.56        | 10.77   | 3.42     | 14.32                       | 0.03    |
| BTK       | 4.17        | 8.61        | 69.60    | 104.19    | 28.63       | 39.18       | 12.92   | 30.81    | 14.22                       | 0.04    |
| CEBPB     | 158.34      | 189.33      | 2289.82  | 2177.47   | 289.45      | 431.03      | 178.70  | 510.10   | 12.91                       | 0.01    |
| SERPING1  | 4.17        | 8.61        | 48.72    | 93.77     | 15.90       | 199.48      | 8.61    | 23.96    | 11.31                       | 0.04    |
| SELL      | 183.34      | 137.70      | 2018.38  | 1479.43   | 225.83      | 78.37       | 219.61  | 475.87   | 10.85                       | 0.01    |
| TGFB1     | 37.50       | 25.82       | 375.84   | 291.72    | 15.90       | 46.31       | 27.99   | 30.81    | 10.63                       | 0.01    |
| HLA-DRB3  | 383.36      | 318.43      | 3215.49  | 3823.60   | 232.19      | 1004.54     | 889.20  | 338.93   | 10.06                       | 0.00    |
| HLA-DRB1  | 945.89      | 748.73      | 8101.35  | 7772.23   | 483.47      | 1916.47     | 1778.40 | 647.04   | 9.45                        | 0.03    |
| CD82      | 66.67       | 120.49      | 591.59   | 854.32    | 209.93      | 427.47      | 678.20  | 746.33   | 7.94                        | 0.04    |
| CIITA     | 29.17       | 34.42       | 194.88   | 208.37    | 19.08       | 53.43       | 55.98   | 30.81    | 6.36                        | 0.01    |
| TRAF1     | 425.03      | 473.34      | 2171.50  | 3010.96   | 1230.94     | 1741.92     | 2284.36 | 1941.13  | 5.70                        | 0.04    |
| CARD9     | 8.33        | 8.61        | 41.76    | 41.67     | 9.54        | 10.69       | 17.22   | 10.27    | 4.92                        | 0.01    |
| CD74      | 3654.39     | 3709.24     | 18763.96 | 17482.31  | 5130.51     | 7227.72     | 6568.88 | 7288.67  | 4.92                        | 0.01    |
| NOD2      | 20.83       | 25.82       | 97.44    | 125.02    | 54.07       | 96.18       | 71.05   | 68.47    | 4.76                        | 0.01    |
| PRKCD     | 154.18      | 129.09      | 612.47   | 729.30    | 197.20      | 260.04      | 243.29  | 352.62   | 4.72                        | 0.01    |
| CD79A     | 8.33        | 8.61        | 27.84    | 31.26     | 3.18        | 14.25       | 10.77   | 30.81    | 3.48                        | 0.02    |
| NCAM1     | 370.86      | 378.67      | 1238.87  | 1104.36   | 289.45      | 178.11      | 348.79  | 472.45   | 3.12                        | 0.03    |
| NFKB1     | 304.18      | 361.46      | 856.07   | 979.34    | 397.59      | 826.43      | 684.66  | 948.31   | 2.77                        | 0.01    |
| IL21R     | 58.34       | 51.64       | 118.32   | 145.86    | 98.60       | 153.17      | 92.58   | 102.71   | 2.39                        | 0.03    |
| IFNGR1    | 704.21      | 585.22      | 327.12   | 250.04    | 365.78      | 334.85      | 430.61  | 438.21   | -2.25                       | 0.05    |
| TNFSF12   | 508.36      | 542.19      | 201.84   | 197.95    | 521.64      | 463.09      | 411.23  | 407.40   | -2.62                       | 0.01    |
| CD28      | 137.51      | 163.52      | 48.72    | 41.67     | 6.36        | 21.37       | 2.15    | 6.85     | -3.32                       | 0.01    |
| CD96      | 4154.42     | 5327.19     | 1552.06  | 1260.64   | 2471.42     | 3708.26     | 2945.34 | 3043.51  | -3.36                       | 0.02    |
| RARRES3   | 1495.92     | 1376.98     | 438.48   | 333.39    | 1320.00     | 1360.76     | 908.58  | 1331.75  | -3.76                       | 0.05    |
| TGFB2     | 1145.90     | 1204.86     | 313.20   | 312.56    | 760.19      | 965.36      | 708.35  | 866.15   | -3.76                       | 0.01    |
| SH2D1A    | 2425.15     | 1772.86     | 549.83   | 427.16    | 1084.63     | 562.83      | 977.47  | 1177.69  | -4.29                       | 0.02    |
| KLRB1     | 9754.75     | 6936.54     | 2136.70  | 1635.71   | 11304.30    | 5535.67     | 2936.73 | 10564.97 | -4.41                       | 0.02    |
| FYN       | 5183.64     | 5146.46     | 1127.51  | 1135.62   | 3689.64     | 4858.85     | 4629.01 | 4210.93  | -4.56                       | 0.00    |
| GF11      | 387.52      | 370.06      | 90.48    | 72.93     | 559.81      | 644.76      | 609.31  | 564.88   | -4.66                       | 0.04    |
| KIR2DL3   | 258.35      | 327.03      | 48.72    | 52.09     | 900.15      | 808.62      | 454.29  | 455.33   | -5.78                       | 0.03    |
| IKZF3     | 1087.57     | 1204.86     | 153.12   | 197.95    | 1189.59     | 1699.17     | 1272.44 | 1458.42  | -6.59                       | 0.02    |
| CD6       | 383.36      | 499.16      | 48.72    | 72.93     | 423.04      | 901.24      | 964.56  | 366.32   | -7.36                       | 0.02    |

Supplementary Table 2
