# Supplementary material
Source: PubMed Central journal article supplement (PMC4718768)
Supplement: NIHMS719837-supplement-10.pdf [file NIHMS719837-supplement-10.pdf]

| Gene_Name | CD56bright |         |        |       | CD56dim |        |        |       | CD56dim: Perfusate vs. PBMC |      |
|-----------|------------|---------|--------|-------|---------|--------|--------|-------|-----------------------------|------|
|           |            |         |        |       |         |        |        |       |                             |      |
| C2        | 4.17       | 34.42   | 6.96   | 31.26 | 25.45   | 35.62  | 8.61   | 10.27 | -3.2                        | 0.05 |
| CCL23     | 12.5       | 25.82   | 6.96   | 10.42 | 3.18    | 3.56   | 12.92  | 10.27 | 3.43                        | 0.03 |
| CCL26     | 4.17       | 8.61    | 6.96   | 20.84 | 9.54    | 14.25  | 2.15   | 3.42  | -4.29                       | 0.04 |
| CD3E      | 2087.62    | 1110.19 | 320.16 | 448   | 807.9   | 776.56 | 342.33 | 335.5 | -2.33                       | 0    |
| IL17F     | 4.17       | 25.82   | 13.92  | 10.42 | 3.18    | 3.56   | 8.61   | 6.85  | 2.28                        | 0.05 |
| KIR2DL5A  | 62.5       | 163.52  | 13.92  | 10.42 | 346.7   | 242.23 | 60.28  | 51.35 | -5.21                       | 0.04 |
| PDGFB     | 4.17       | 17.21   | 55.68  | 41.67 | 3.18    | 3.56   | 8.61   | 6.85  | 2.28                        | 0.05 |

Supplementary Table 3
