# Supplementary material
Source: PubMed Central journal article supplement (PMC4718768)

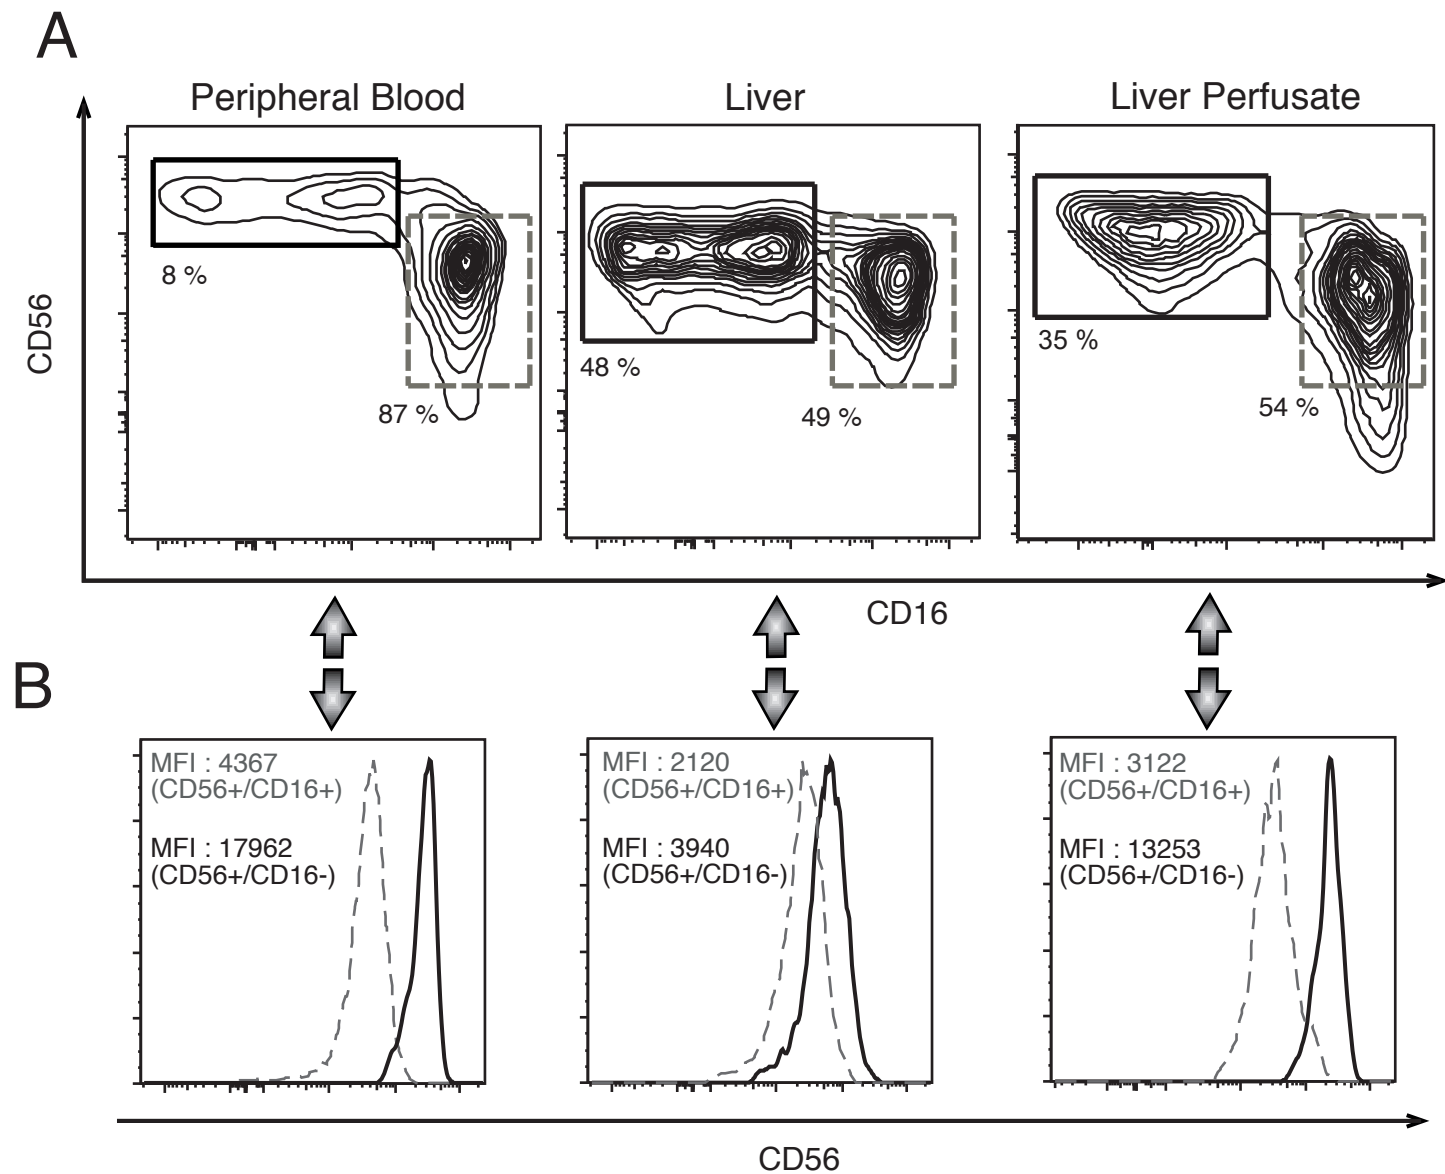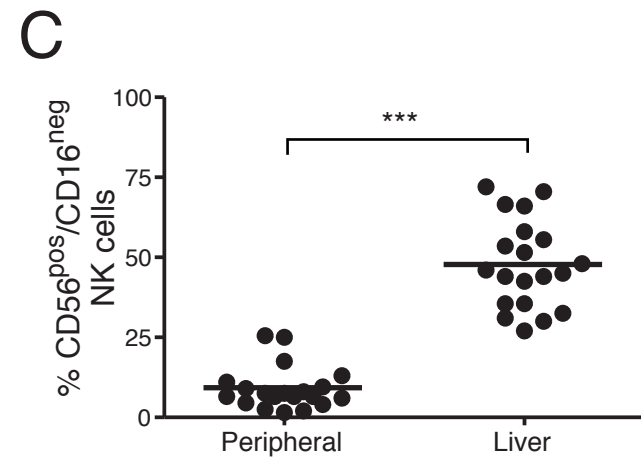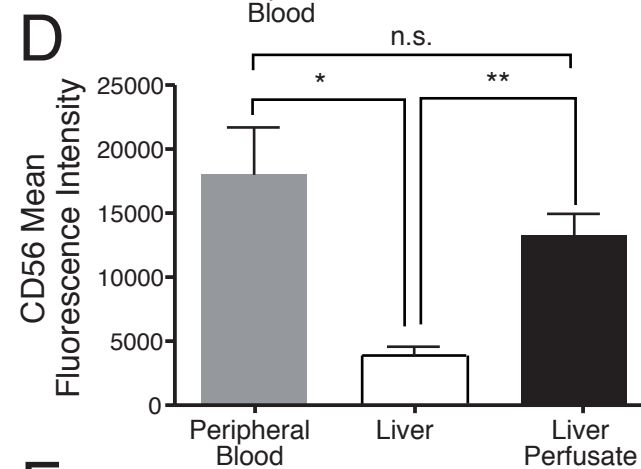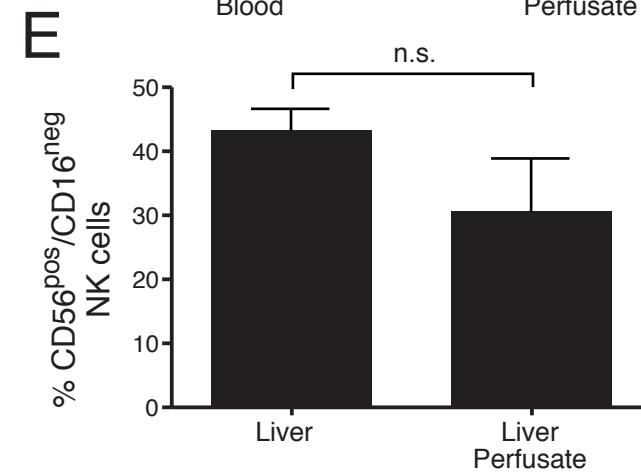

Supplement: NIHMS719837-supplement-1.pdf [file NIHMS719837-supplement-1.pdf]

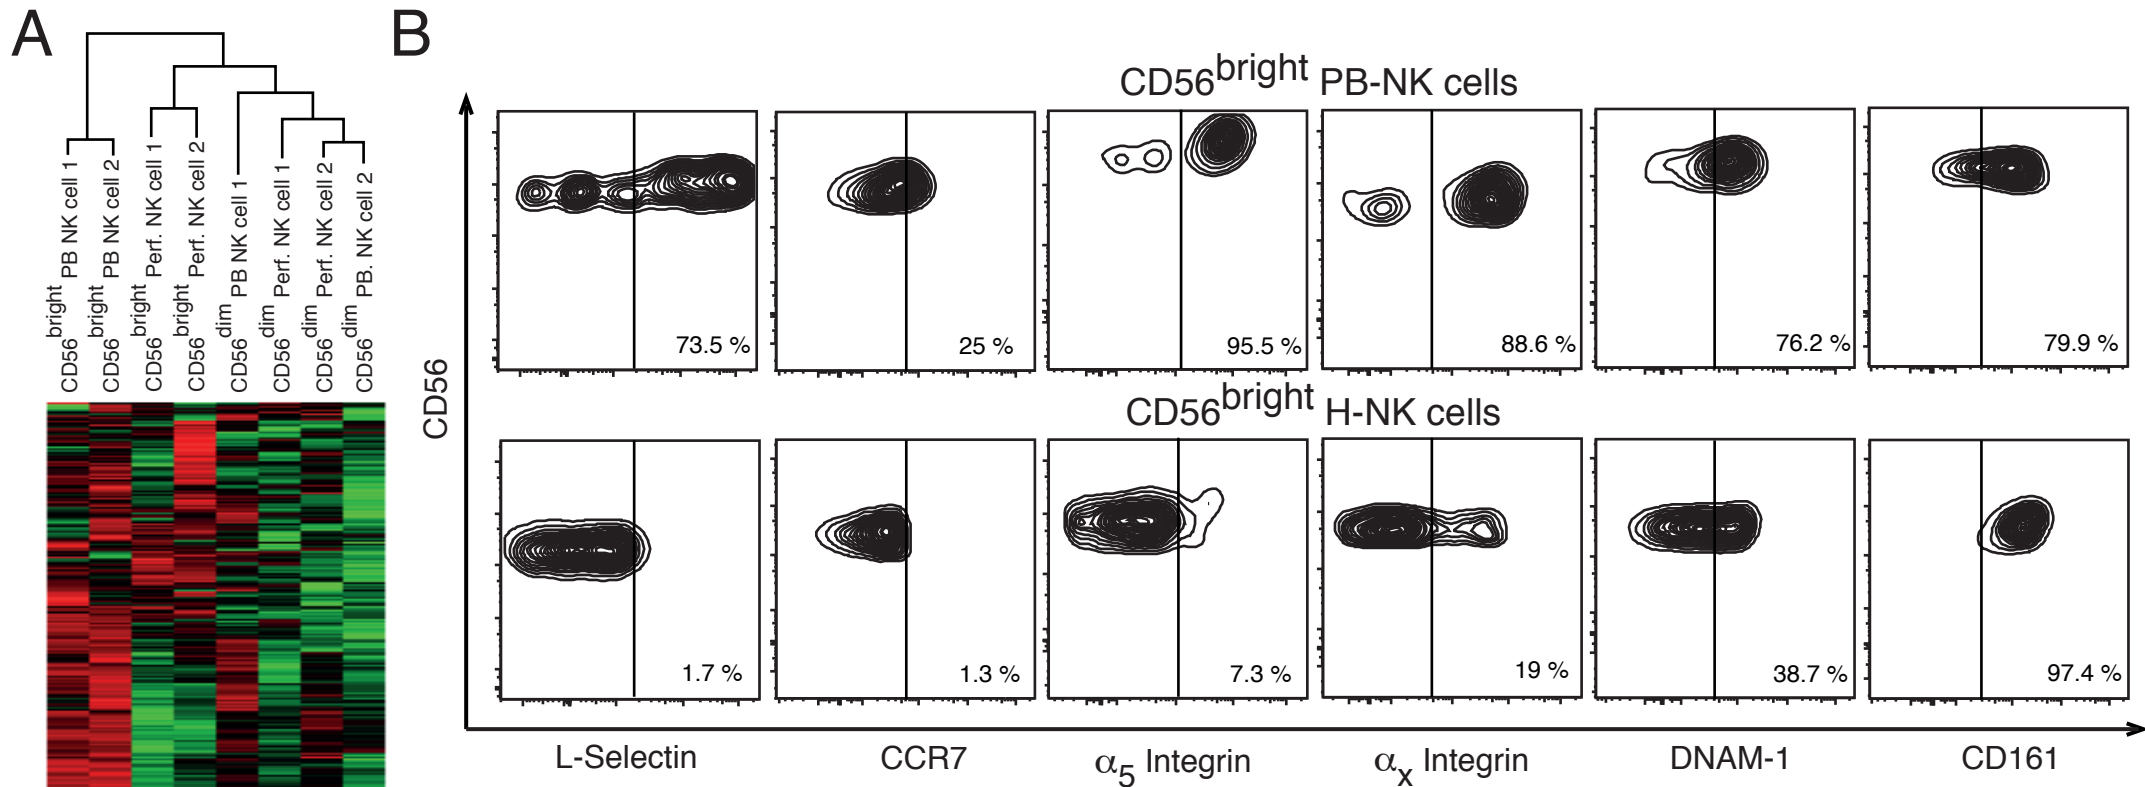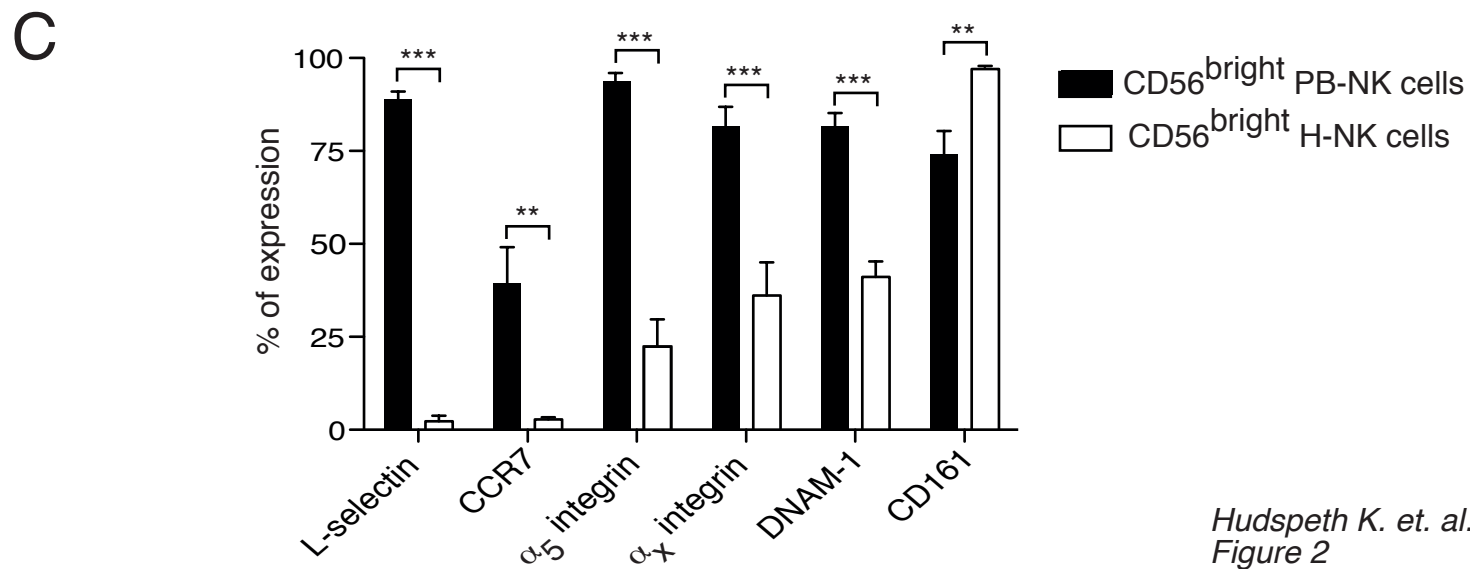

Hudspeth K. et. al.  
Figure 2

Supplement: NIHMS719837-supplement-2.pdf [file NIHMS719837-supplement-2.pdf]

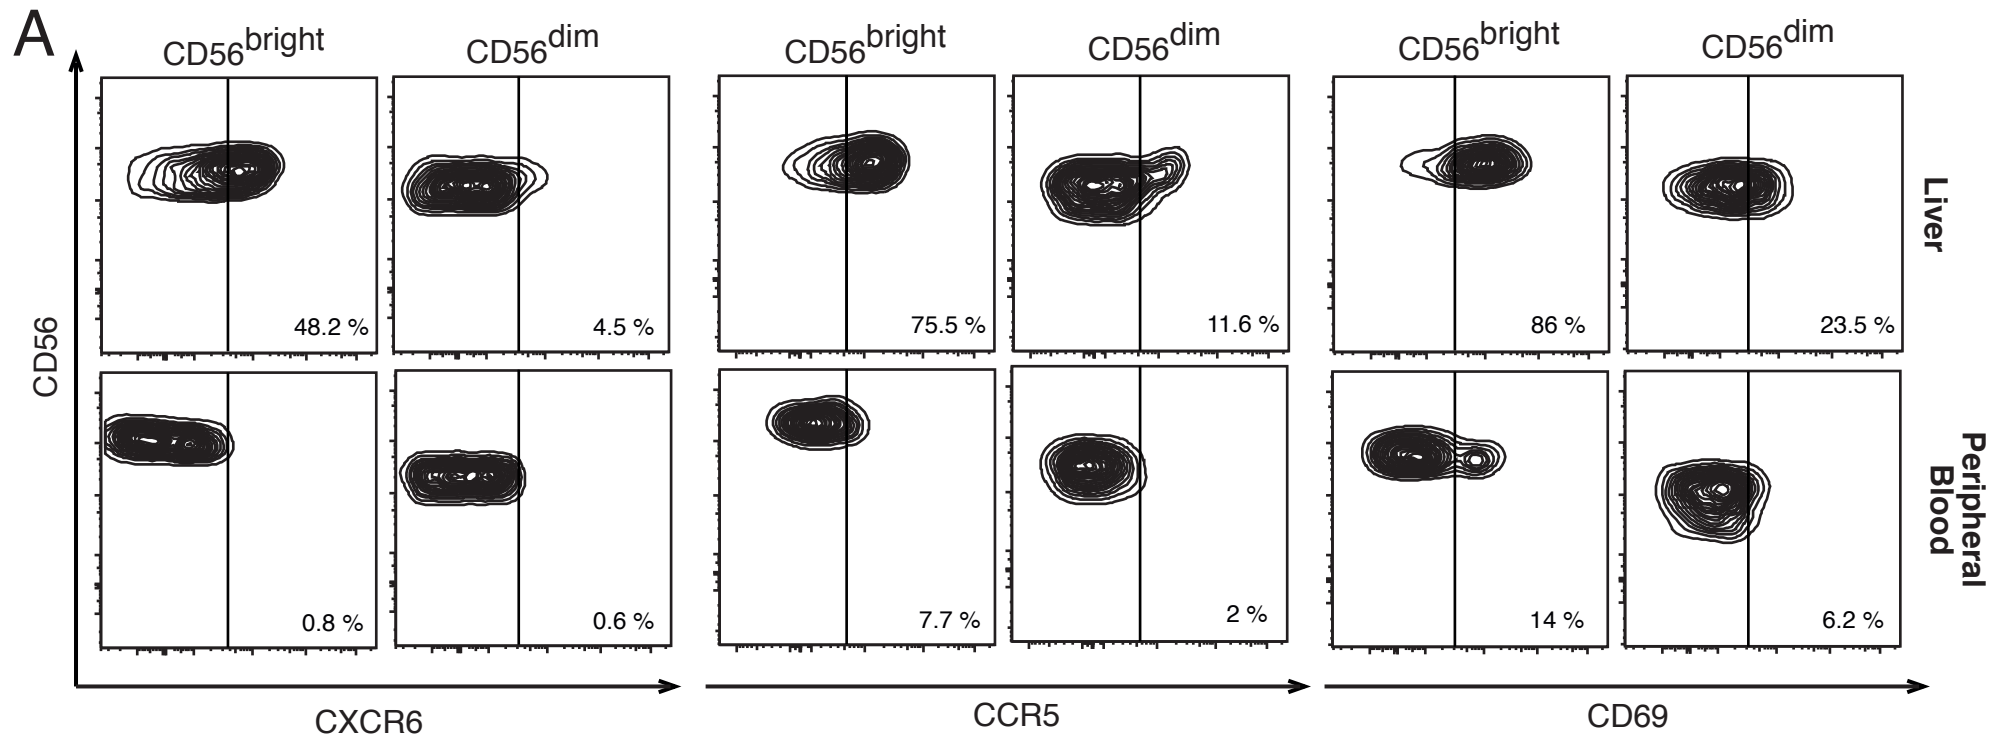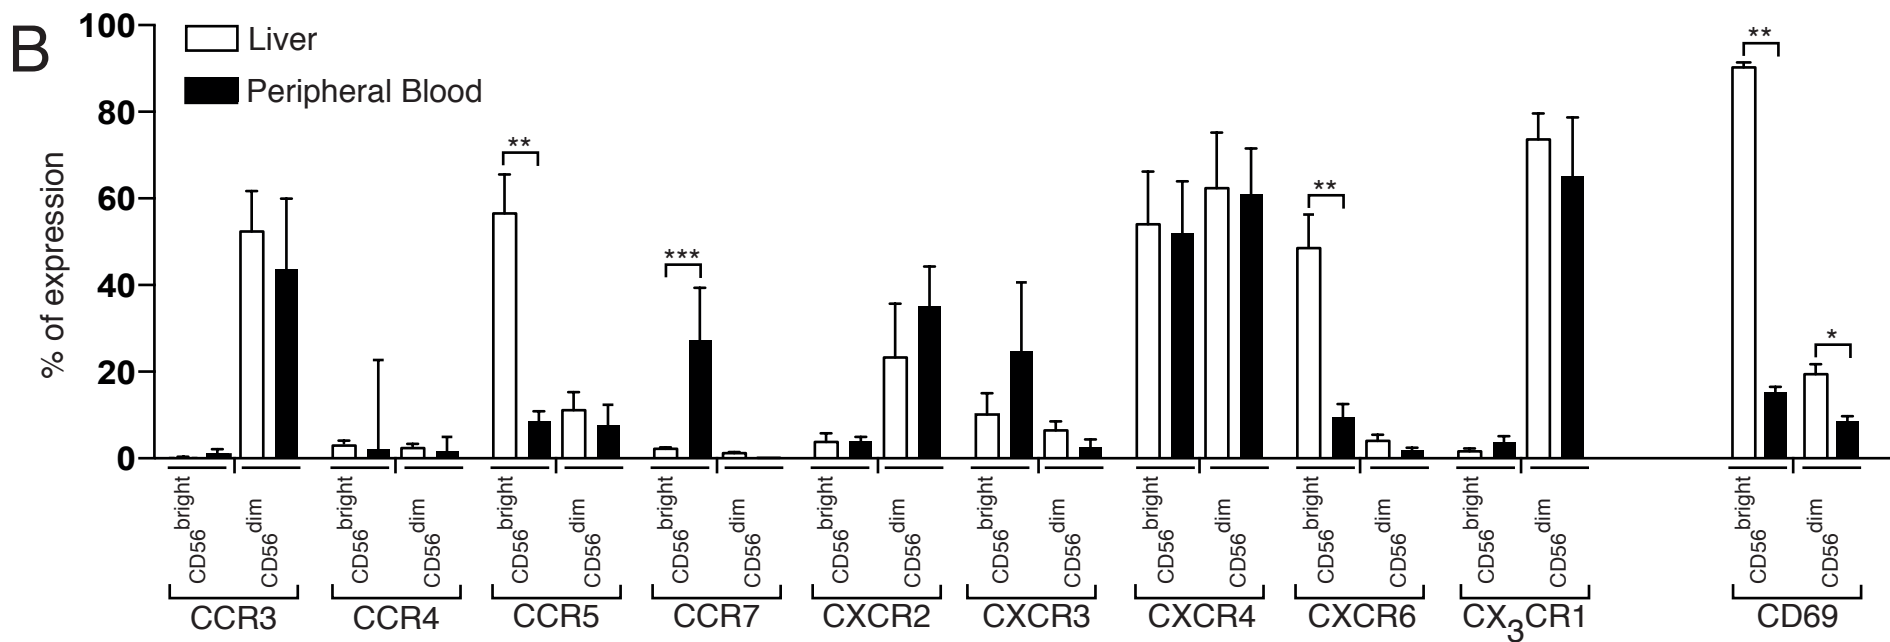

Supplement: NIHMS719837-supplement-3.pdf [file NIHMS719837-supplement-3.pdf]

**A**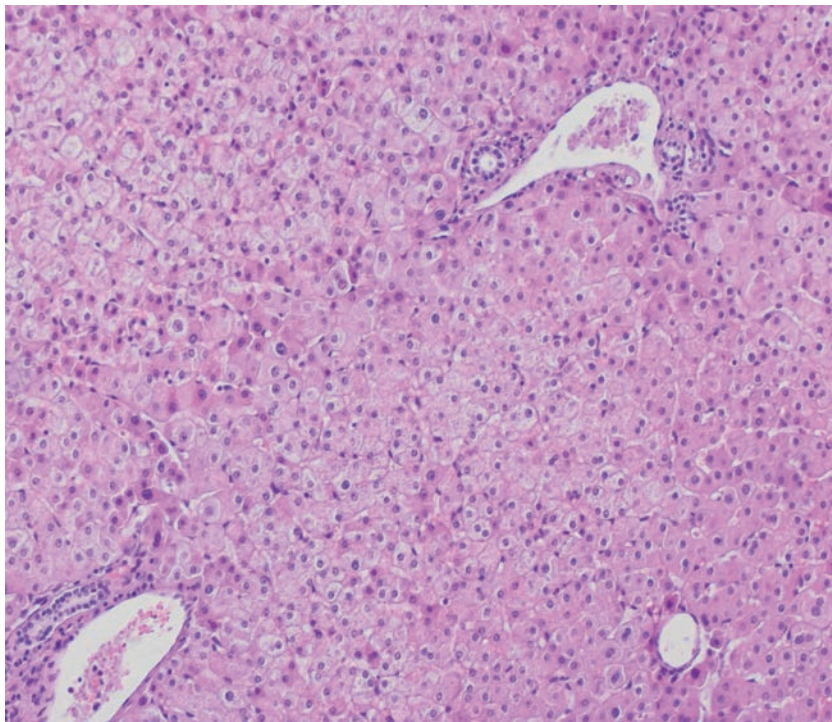**B**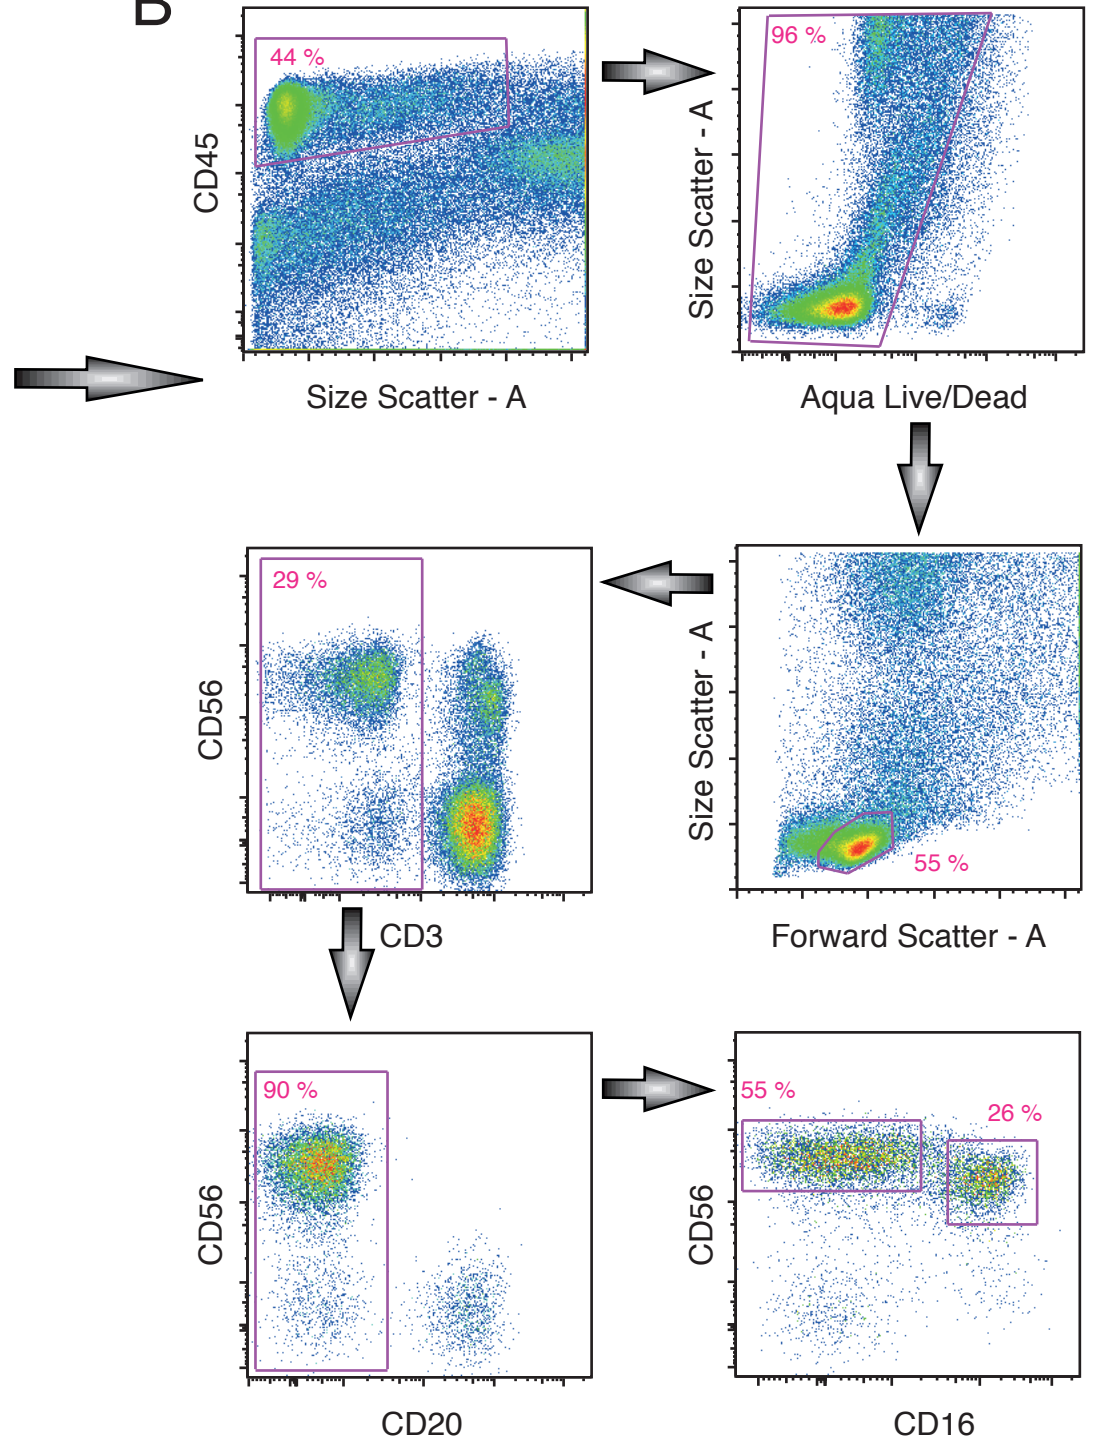

Supplement: NIHMS719837-supplement-5.pdf [file NIHMS719837-supplement-5.pdf]

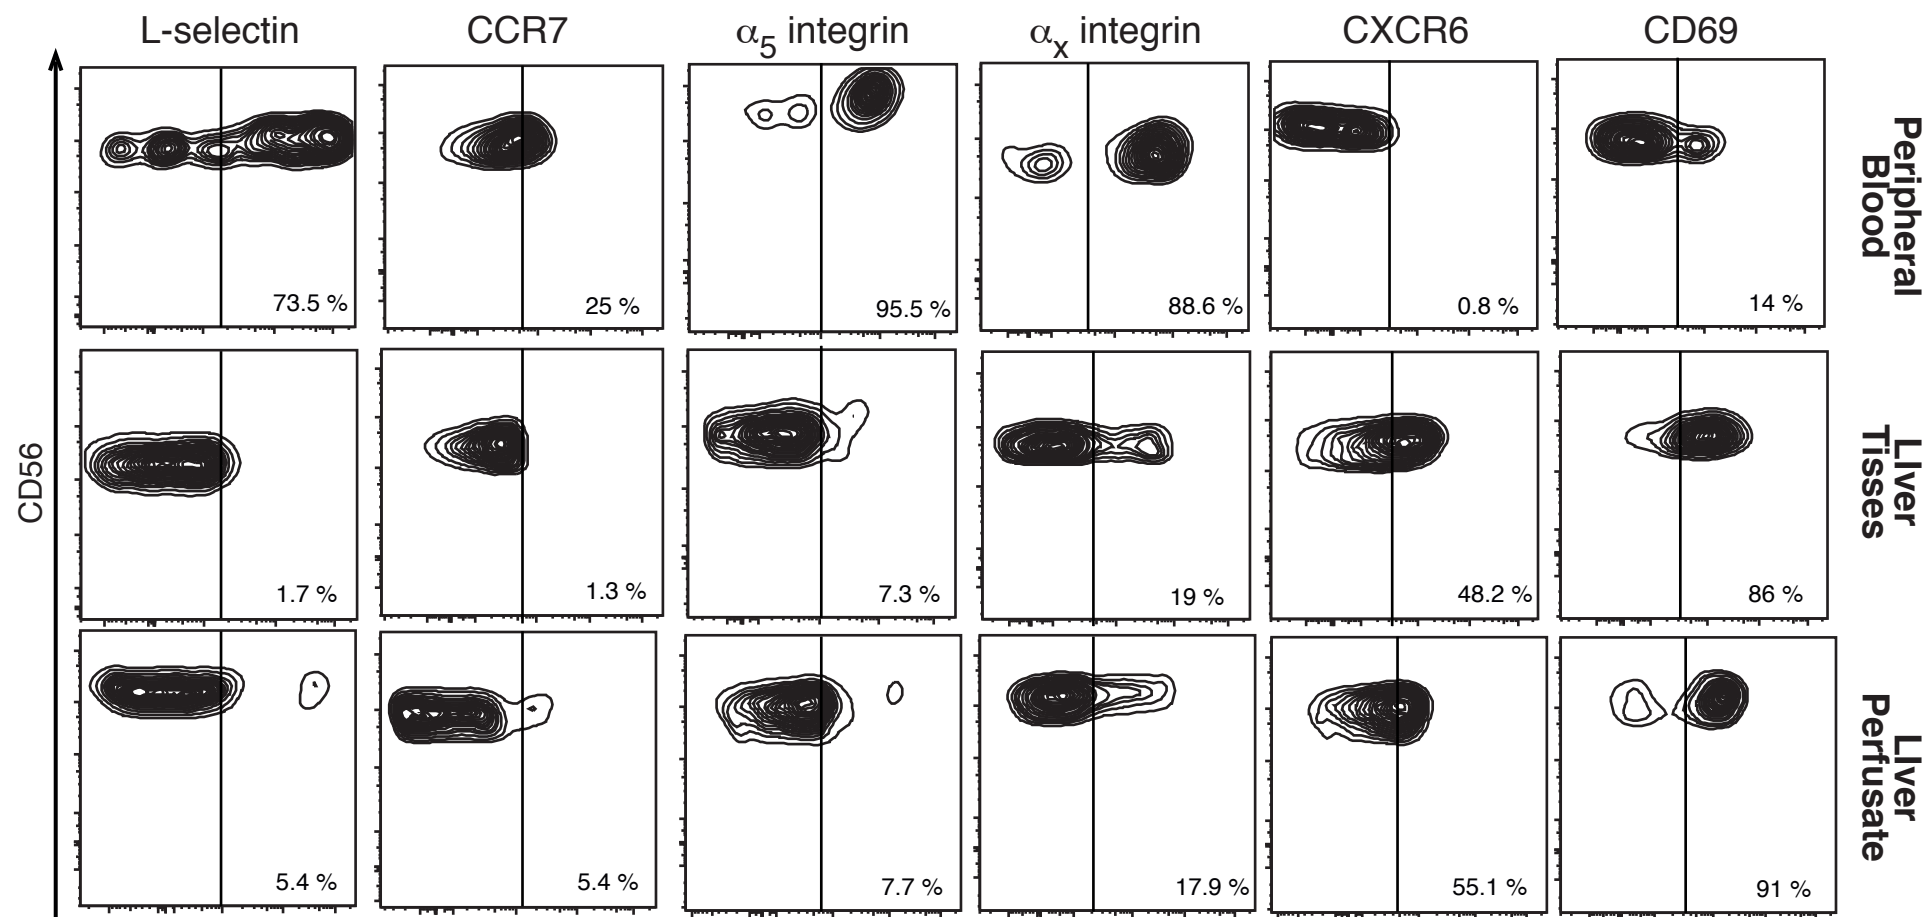

Supplement: NIHMS719837-supplement-6.pdf [file NIHMS719837-supplement-6.pdf]

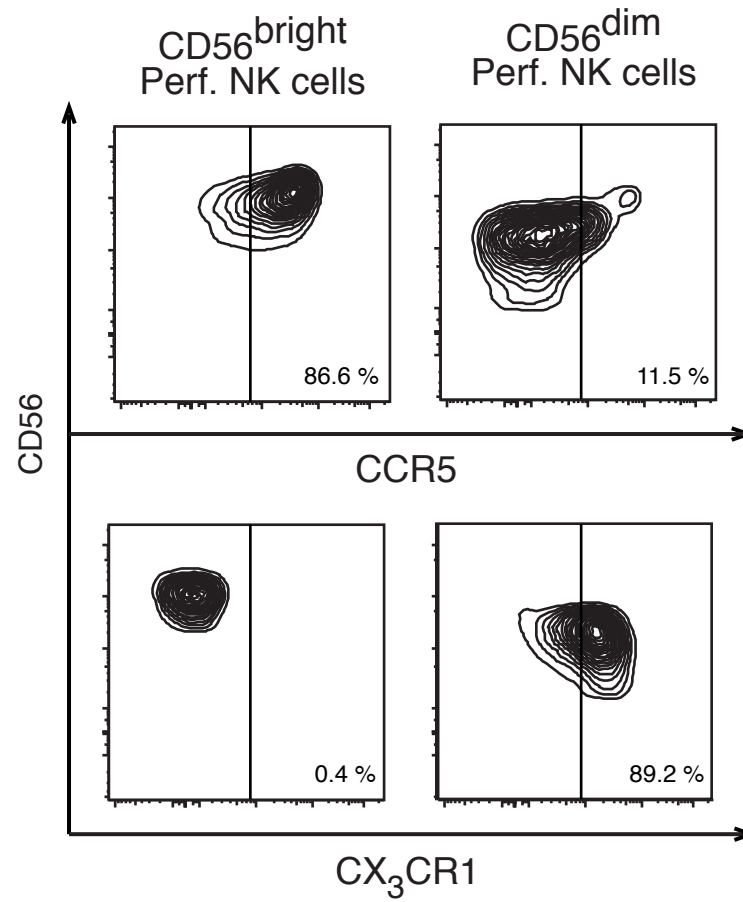

*Hudspeth K. et. al.*  
*Supplementary Figure 3*

Supplement: NIHMS719837-supplement-7.pdf [file NIHMS719837-supplement-7.pdf]
